# Supplementary material
Source: publisher figshare collection journal article supplement (https://acs.figshare.com/ndownloader/files/4105291)

**Supporting information for**

**Efficient 2-Arylbenzothiazole Formation from Aryl Ketones and**

**2-Aminobenzenethiols under Metal-Free Conditions**

Yunfeng Liao,<sup>a</sup> Hongrui Qi,<sup>a</sup> Shanping Chen,<sup>a</sup> Pengcheng Jiang,<sup>a</sup> Wang Zhou,<sup>b</sup>  
Guo-Jun Deng<sup>a,\*</sup>

<sup>a</sup> Key Laboratory of Environmentally Friendly Chemistry and Application of Ministry of Education, College of Chemistry, Xiangtan University, Xiangtan 411105, China; e-mail:gideng@xtu.edu.cn;

<sup>b</sup> College of Chemical Engineering, Xiangtan University, Xiangtan 411105, China.

**Table of Contents**

|                                                                                  |              |
|----------------------------------------------------------------------------------|--------------|
| <b>1. General information</b>                                                    | <b>2</b>     |
| <b>2. General procedure for preparation</b>                                      | <b>2</b>     |
| <b>3. Characterization data of products</b>                                      | <b>2-10</b>  |
| <b>4. References</b>                                                             | <b>11</b>    |
| <b>5. Copies of <sup>1</sup>H and <sup>13</sup>C NMR spectra of all products</b> | <b>12-32</b> |
| <b>6. GC-MS and <sup>13</sup>C NMR for 13C labeling reaction</b>                 | <b>33-34</b> |

### General information:

All reactions were carried out under an atmosphere of oxygen unless otherwise noted. Column chromatography was performed using silica gel (200-300 mesh).  $^1\text{H}$  NMR and  $^{13}\text{C}$  NMR spectra were recorded on Bruker-AV (400 and 100 MHz, respectively) instrument internally referenced to tetramethylsilane (TMS) or chloroform signals. Mass spectra was measured on Agilent 5975 GC-MS instrument (EI). The structure of known compounds were further corroborated by comparing their  $^1\text{H}$  NMR,  $^{13}\text{C}$  NMR data and MS data with those of literature. All reagents were obtained from commercial suppliers and used without further purification.

### General procedure (3a):

A 10 mL sealed tube was purged with oxygen for three times and was added 2-aminobenzenethiol (**1a**, 96.4  $\mu\text{L}$ , 0.9 mmol), acetophenone (**2a**, 58  $\mu\text{L}$ , 0.5 mmol), DMSO (71  $\mu\text{L}$ , 1.0 mmol) and chlorobenzene (2.0 mL) by syringe. The reaction vessel was stirred at 140  $^\circ\text{C}$  for 16 h. After cooling to room temperature, the volatiles were removed under reduced pressure. The residue was purified by column chromatography on silica gel (petroleum ether/EtOAc = 200:1) to yield the desired product **3a** as white solid (76 mg, 72% yield). Reactions of 2-aminobenzenethiol (**1a**) with propiophenone (**2b**), ethyl 3-oxo-3-phenylpropanoate (**2c**) and benzaldehyde (**2d**) were carried out under similar reaction conditions.

### 2-Phenylbenzo[d]thiazole (**3a**, CAS: 883-93-2) <sup>[1]</sup>

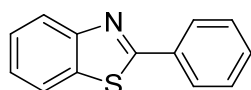

$^1\text{H}$  NMR (400 MHz,  $\text{CDCl}_3$ , ppm)  $\delta$  8.10-8.07 (m, 3H), 7.91 (d,  $J$  = 8.0 Hz, 1H), 7.50 (m, 4H), 7.39 (t,  $J$  = 7.4 Hz, 1H);  $^{13}\text{C}$  NMR (100 MHz,  $\text{CDCl}_3$ , ppm)  $\delta$  168.0, 154.2, 135.1, 133.7, 130.9, 129.0, 127.6, 126.2, 125.1, 123.3, 121.6; MS (EI)  $m/z$  (%) 211 (100), 184, 108, 82, 69.

### 2-(p-Tolyl)benzo[d]thiazole (**3b**, CAS: 16112-21-3) <sup>[2]</sup>

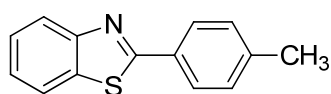

The reaction was conducted with 2-aminobenzenethiol (**1a**, 96.4  $\mu\text{L}$ , 0.9 mmol) and 1-(p-tolyl)ethanone (**2e**, 66.8  $\mu\text{L}$ , 0.5 mmol). The residue was purified by column chromatography

on silica gel (petroleum ether/EtOAc = 200:1) afforded the product **3b** as white solid (85.5 mg, 76%).

<sup>1</sup>H NMR (400 MHz, CDCl<sub>3</sub>, ppm)  $\delta$  8.06 (d,  $J$  = 8.0 Hz, 1H), 7.98 (d,  $J$  = 8.0 Hz, 2H), 7.89 (d,  $J$  = 8.0 Hz, 1H), 7.48 (t,  $J$  = 7.6 Hz, 1H), 7.37 (t,  $J$  = 7.4 Hz, 1H), 7.30 (d,  $J$  = 8.0 Hz, 2H), 2.42 (s, 3H); <sup>13</sup>C NMR (100 MHz, CDCl<sub>3</sub>, ppm)  $\delta$  168.2, 154.2, 141.3, 135.0, 131.1, 129.7, 127.5, 126.2, 125.0, 123.1, 121.5, 21.4; MS (EI)  $m/z$  (%) 225 (100), 210, 116, 108, 69.

**2-(4-Methoxyphenyl)benzo[d]thiazole (3c, CAS: 6265-92-5)** <sup>[3]</sup>

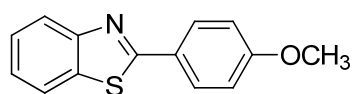

The reaction was conducted with 2-aminobenzenethiol (**1a**, 96.4  $\mu$ L, 0.9 mmol) and 1-(4-methoxyphenyl)ethanone (**2f**, 75 mg, 0.5 mmol). The residue was purified by column chromatography on silica gel (petroleum ether/EtOAc = 200:1) afforded the product **3c** as white solid (74.7 mg, 62%).

<sup>1</sup>H NMR (400 MHz, CDCl<sub>3</sub>, ppm)  $\delta$  8.04 (d,  $J$  = 8.4 Hz, 3H), 7.88 (d,  $J$  = 8.0 Hz, 1H), 7.47 (t,  $J$  = 7.6 Hz, 1H), 7.35 (t,  $J$  = 7.4 Hz, 1H), 7.00 (d,  $J$  = 8.4 Hz, 2H), 3.88 (s, 3H); <sup>13</sup>C NMR (100 MHz, CDCl<sub>3</sub>, ppm)  $\delta$  167.8, 162.0, 154.3, 134.9, 129.1, 126.5, 126.1, 124.7, 122.8, 121.4, 114.4, 55.4; MS (EI)  $m/z$  (%) 241(100), 226, 198, 154, 69.

**2-(4-Fluorophenyl)benzo[d]thiazole (3d, CAS: 6265-92-5)** <sup>[4]</sup>

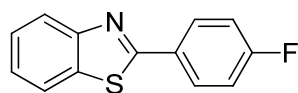

The reaction was conducted with 2-aminobenzenethiol (**1a**, 96.4  $\mu$ L, 0.9 mmol) and 1-(4-fluorophenyl)ethanone (**2g**, 60.6  $\mu$ L, 0.5 mmol). The residue was purified by column chromatography on silica gel (petroleum ether/EtOAc = 100:1) afforded the product **3d** as white solid (84.7 mg, 74%).

<sup>1</sup>H NMR (400 MHz, CDCl<sub>3</sub>, ppm)  $\delta$  8.11-8.05 (m, 3H), 7.90 (d,  $J$  = 7.6 Hz, 1H), 7.50 (t,  $J$  = 7.4 Hz, 1H), 7.39 (t,  $J$  = 7.6 Hz, 1H), 7.19 (t,  $J$  = 8.6 Hz, 2H); <sup>13</sup>C NMR (100 MHz, CDCl<sub>3</sub>, ppm)  $\delta$  166.7, 164.4 (d,  $J$  = 250.3 Hz), 154.1, 135.0, 130.0 (d,  $J$  = 3.2 Hz), 129.5 (d,  $J$  = 8.6 Hz), 126.4, 125.2, 123.2, 121.6, 116.1 (d,  $J$  = 22.0 Hz); MS (EI)  $m/z$  (%) 229 (100), 202, 108, 82, 69.

**2-(4-Chlorophenyl)benzo[d]thiazole (3e, CAS: 6265-91-4)** <sup>[3]</sup>

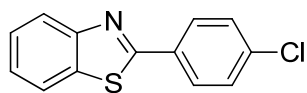

The reaction was conducted with 2-aminobenzenethiol (**1a**, 96.4  $\mu$ L, 0.9 mmol) and 1-(4-chlorophenyl)ethanone (**2h**, 65  $\mu$ L, 0.5 mmol). The residue was purified by column chromatography on silica gel (petroleum ether/EtOAc = 100:1) afforded the product **3e** as white solid (86 mg, 70%).

<sup>1</sup>H NMR (400 MHz, CDCl<sub>3</sub>, ppm)  $\delta$  8.08-8.02 (m, 3H), 7.91 (d,  $J$  = 8.0 Hz, 1H), 7.52-7.46 (m, 3H), 7.40 (t,  $J$  = 7.4 Hz, 1H); <sup>13</sup>C NMR (100 MHz, CDCl<sub>3</sub>, ppm)  $\delta$  166.6, 154.1, 137.0, 135.1, 132.2, 129.2, 128.7, 126.4, 125.4, 123.3, 121.6; MS (EI)  $m/z$  (%) 245 (100), 210, 108, 82, 69.

**2-(2-Chlorophenyl)benzo[d]thiazole (3f, CAS: 6269-46-1)** <sup>[5]</sup>

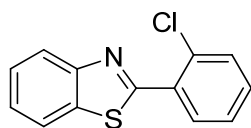

The reaction was conducted with 2-aminobenzenethiol (**1a**, 96.4  $\mu$ L, 0.9 mmol) and 1-(2-chlorophenyl)ethanone (**2i**, 67  $\mu$ L, 0.5 mmol). The residue was purified by column chromatography on silica gel (petroleum ether/EtOAc = 50:1) afforded the product **3f** as white solid (79.8 mg, 65%).

<sup>1</sup>H NMR (400 MHz, CDCl<sub>3</sub>, ppm)  $\delta$  8.23-8.20 (m, 1H), 8.14 (d,  $J$  = 8.0 Hz, 1H), 7.96 (d,  $J$  = 8.0 Hz, 1H), 7.53 (t,  $J$  = 7.2 Hz, 2H), 7.46-7.41 (m, 3H); <sup>13</sup>C NMR (100 MHz, CDCl<sub>3</sub>, ppm)  $\delta$  164.1, 152.6, 136.1, 132.7, 132.3, 131.7, 131.0, 130.8, 127.0, 126.2, 125.4, 123.5, 121.3; MS (EI)  $m/z$  (%) 245 (100), 210, 108, 82, 69.

**2-(3-(Trifluoromethyl)phenyl)benzo[d]thiazole (3g, CAS: 133389-19-2)** <sup>[6]</sup>

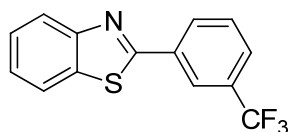

The reaction was conducted with 2-aminobenzenethiol (**1a**, 96.4  $\mu$ L, 0.9 mmol) and

1-(3-(trifluoromethyl)phenyl)ethanone (**2j**, 76  $\mu$ L, 0.5 mmol). The residue was purified by column chromatography on silica gel (petroleum ether/EtOAc = 100:1) afforded the product **3g** as white solid (83.7 mg, 60%).

$^1\text{H}$  NMR (400 MHz,  $\text{CDCl}_3$ , ppm)  $\delta$  8.39 (s, 1H), 8.26 (d,  $J$  = 7.6 Hz, 1H), 8.11 (d,  $J$  = 8.4 Hz, 1H), 7.94 (d,  $J$  = 7.6 Hz, 1H), 7.75 (d,  $J$  = 7.6 Hz, 1H), 7.63 (t,  $J$  = 7.6 Hz, 1H), 7.53 (t,  $J$  = 7.6 Hz, 1H), 7.44 (t,  $J$  = 7.6 Hz, 1H);  $^{13}\text{C}$  NMR (100 MHz,  $\text{CDCl}_3$ , ppm)  $\delta$  166.0, 154.1, 135.1, 134.5, 131.7 (q,  $J$  = 32.5 Hz), 130.7, 129.5, 127.3 (q,  $J$  = 3.7 Hz), 126.6, 125.7, 124.3 (q,  $J$  = 3.8 Hz), 123.8 (q,  $J$  = 270.9 Hz), 123.6, 121.7; MS (EI)  $m/z$  (%) 279 (100), 260, 108, 82, 69.

### 2-(3-Nitrophenyl)benzo[d]thiazole (**3h**, CAS: 22868-33-3)<sup>[7]</sup>

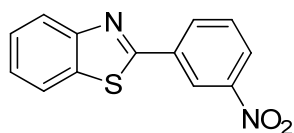

The reaction was conducted with 2-aminobenzenethiol (**1a**, 96.4  $\mu$ L, 0.9 mmol) and 1-(3-nitrophenyl)ethanone (**2k**, 82.5 mg, 0.5 mmol). The residue was purified by column chromatography on silica gel (petroleum ether/EtOAc = 100:1) afforded the product **3h** as white solid (84.5 mg, 66%).

$^1\text{H}$  NMR (400 MHz,  $\text{CDCl}_3$ , ppm)  $\delta$  8.94 (s, 1H), 8.43 (d,  $J$  = 7.6 Hz, 1H), 8.34 (d,  $J$  = 7.6 Hz, 1H), 8.13 (d,  $J$  = 8.0 Hz, 1H), 7.96 (d,  $J$  = 8.0 Hz, 1H), 7.70 (t,  $J$  = 7.6 Hz, 1H), 7.56 (t,  $J$  = 7.6 Hz, 1H), 7.46 (t,  $J$  = 7.6 Hz, 1H);  $^{13}\text{C}$  NMR (100 MHz,  $\text{CDCl}_3$ , ppm)  $\delta$  164.9, 153.9, 148.7, 135.3, 135.2, 133.0, 130.1, 126.8, 126.0, 125.1, 123.7, 122.3, 121.8; MS (EI)  $m/z$  (%) 256 (100), 210, 139, 105, 69.

### 2-(Naphthalen-1-yl)benzo[d]thiazole (**3i**, CAS: 56048-50-1)<sup>[8]</sup>

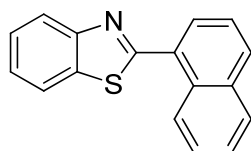

The reaction was conducted with 2-aminobenzenethiol (**1a**, 96.4  $\mu$ L, 0.9 mmol) and 1-(naphthalen-1-yl)ethanone (**2l**, 76  $\mu$ L, 0.5 mmol). The residue was purified by column chromatography on silica gel (petroleum ether/EtOAc = 50:1) afforded the product **3i** as colorless

liquid (88.7 mg, 68%).

$^1\text{H}$  NMR (400 MHz,  $\text{CDCl}_3$ , ppm)  $\delta$  8.93 (d,  $J$  = 8.4 Hz, 1H), 8.20 (d,  $J$  = 8.0 Hz, 1H), 8.01-7.93 (m, 4H), 7.64-7.54 (m, 4H), 7.46 (t,  $J$  = 7.4 Hz, 1H);  $^{13}\text{C}$  NMR (100 MHz,  $\text{CDCl}_3$ , ppm)  $\delta$  167.6, 154.2, 135.5, 134.1, 131.0, 130.9, 130.7, 129.3, 128.4, 127.6, 126.5, 126.2, 125.9, 125.3, 125.0, 123.6, 121.4; MS (EI)  $m/z$  (%) 261, 260 (100), 130, 116, 69.

**2-(Pyridin-4-yl)benzo[d]thiazole (3j, CAS: 2295-38-7)**<sup>[9]</sup>

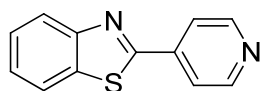

The reaction was conducted with 2-aminobenzenethiol (**1a**, 96.4  $\mu\text{L}$ , 0.9 mmol) and 1-(pyridin-4-yl)ethanone (**2m**, 55.3  $\mu\text{L}$ , 0.5 mmol). The residue was purified by column chromatography on silica gel (petroleum ether/EtOAc = 4:1) afforded the product **3j** as white solid (58.3 mg, 55%).

$^1\text{H}$  NMR (400 MHz,  $\text{CDCl}_3$ , ppm)  $\delta$  8.78 (d,  $J$  = 4.8 Hz, 2H), 8.14 (d,  $J$  = 8.0 Hz, 1H), 7.96-7.95 (m, 3H), 7.56 (t,  $J$  = 7.6 Hz, 1H), 7.47 (t,  $J$  = 7.4 Hz, 1H);  $^{13}\text{C}$  NMR (100 MHz,  $\text{CDCl}_3$ , ppm)  $\delta$  165.1, 154.0, 150.7, 140.5, 135.2, 126.8, 126.2, 123.9, 121.8, 121.2; MS (EI)  $m/z$  (%) 212 (100), 186, 108, 82, 69.

**2-(Thiophen-2-yl)benzo[d]thiazole (3k, CAS: 34243-38-4)**<sup>[9]</sup>

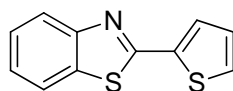

The reaction was conducted with 2-aminobenzenethiol (**1a**, 96.4  $\mu\text{L}$ , 0.9 mmol) and 1-(thiophen-2-yl)ethanone (**2n**, 54  $\mu\text{L}$ , 0.5 mmol). The residue was purified by column chromatography on silica gel (petroleum ether/EtOAc = 100:1) afforded the product **3k** as white solid (65.1 mg, 60%).

$^1\text{H}$  NMR (400 MHz,  $\text{CDCl}_3$ , ppm)  $\delta$  8.03 (d,  $J$  = 8.4 Hz, 1H), 7.85 (d,  $J$  = 8.0 Hz, 1H), 7.66 (d,  $J$  = 3.2 Hz, 1H), 7.51-7.45 (m, 2H), 7.37 (t,  $J$  = 7.6 Hz, 1H), 7.14 (t,  $J$  = 4.2 Hz, 1H);  $^{13}\text{C}$  NMR (100 MHz,  $\text{CDCl}_3$ , ppm)  $\delta$  161.3, 153.7, 137.4, 134.7, 129.2, 128.5, 128.0, 126.4, 125.2, 123.0, 121.4; MS (EI)  $m/z$  (%) 217 (100), 173, 108, 82, 69.

**6-Methyl-2-phenylbenzo[d]thiazole (3l, CAS: 10205-58-0)**<sup>[5]</sup>

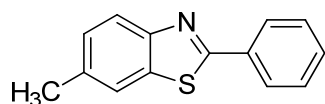

The reaction was conducted with 2-amino-5-methylbenzenethiol (**1b**, 125 mg, 0.9 mmol) and acetophenone (**2a**, 58  $\mu$ L, 0.5 mmol). The residue was purified by column chromatography on silica gel (petroleum ether/EtOAc = 50:1) afforded the product **3l** as white solid (83.3 mg, 74%).

<sup>1</sup>H NMR (400 MHz, CDCl<sub>3</sub>, ppm)  $\delta$  8.07 (d,  $J$  = 3.6 Hz, 2H), 7.95 (d,  $J$  = 8.4 Hz, 1H), 7.70 (s, 1H), 7.49-7.48 (m, 3H), 7.30 (d,  $J$  = 8.4 Hz, 1H), 2.50 (s, 3H); <sup>13</sup>C NMR (100 MHz, CDCl<sub>3</sub>, ppm)  $\delta$  167.0, 152.3, 135.3, 135.2, 133.7, 130.7, 128.9, 127.9, 127.4, 122.7, 121.3, 21.5; MS (EI)  $m/z$  (%) 225 (100), 209, 121, 77, 69.

**6-Methoxy-2-phenylbenzo[d]thiazole (3m, CAS: 10205-69-3)**<sup>[10]</sup>

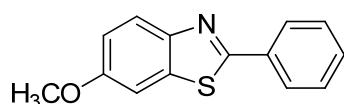

The reaction was conducted with 2-amino-5-methoxybenzenethiol (**1c**, 139.5 mg, 0.9 mmol) and acetophenone (**2a**, 58  $\mu$ L, 0.5 mmol). The residue was purified by column chromatography on silica gel (petroleum ether/EtOAc = 20:1) afforded the product **3m** as white solid (96.4 mg, 80%).

<sup>1</sup>H NMR (400 MHz, CDCl<sub>3</sub>, ppm)  $\delta$  8.05-8.04 (m, 2H), 7.96 (d,  $J$  = 8.8 Hz, 1H), 7.49-7.47 (m, 3H), 7.36 (s, 1H), 7.10 (m, 1H), 3.90 (s, 3H); <sup>13</sup>C NMR (100 MHz, CDCl<sub>3</sub>, ppm)  $\delta$  165.5, 157.8, 148.7, 136.4, 133.8, 130.5, 128.9, 127.2, 123.7, 115.6, 104.2, 55.8; MS (EI)  $m/z$  (%) 241 (100), 226, 198, 95, 69.

**6-Chloro-2-phenylbenzo[d]thiazole (3n, CAS: 7466-32-2)**<sup>[11]</sup>

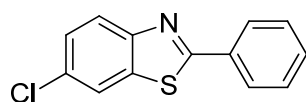

The reaction was conducted with 2-amino-5-chlorobenzenethiol (**1d**, 143.7 mg, 0.9 mmol), acetophenone (**2a**, 58  $\mu$ L, 0.5 mmol). The residue was purified by column chromatography on silica gel (petroleum ether/EtOAc = 500:1) afforded the product **3n** as white solid (85.9 mg, 70%).

<sup>1</sup>H NMR (400 MHz, CDCl<sub>3</sub>, ppm)  $\delta$  8.08-8.07 (m, 2H), 7.97 (d,  $J$  = 8.8 Hz, 1H), 7.88 (s, 1H), 7.51-7.44 (m, 4H); <sup>13</sup>C NMR (100 MHz, CDCl<sub>3</sub>, ppm)  $\delta$  168.5, 152.7, 136.2, 133.2, 131.2, 131.1,

129.1, 127.5, 127.1, 123.9, 121.2; MS (EI)  $m/z$  (%) 245 (100), 218, 142, 107, 70.

**6-Bromo-2-phenylbenzo[d]thiazole (3o, CAS: 77333-67-6)**<sup>[10]</sup>

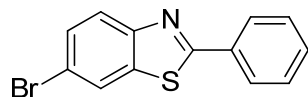

The reaction was conducted with 2-amino-5-bromobenzenethiol (**1e**, 183.6 mg, 0.9 mmol), acetophenone (**2a**, 58  $\mu$ L, 0.5 mmol). The residue was purified by column chromatography on silica gel (petroleum ether/EtOAc = 500:1) afforded the product **3o** as white solid (117.5 mg, 81%).

<sup>1</sup>H NMR (400 MHz, CDCl<sub>3</sub>, ppm)  $\delta$  8.08-8.05 (m, 3H), 7.92 (d,  $J$  = 8.8 Hz, 1H), 7.59 (d,  $J$  = 7.6 Hz, 1H), 7.51-7.50 (m, 3H); <sup>13</sup>C NMR (100 MHz, CDCl<sub>3</sub>, ppm)  $\delta$  168.5, 153.1, 136.7, 133.3, 131.2, 129.8, 129.1, 127.6, 124.3, 124.1, 118.7; MS (EI)  $m/z$  (%) 291 (100), 288, 209, 188, 77.

**4-Methyl-2-phenylbenzo[d]thiazole (3p, CAS: 63325-84-8)**<sup>[10]</sup>

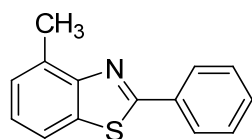

The reaction was conducted with 2-amino-3-methylbenzenethiol (**1f**, 125 mg, 0.9 mmol) and acetophenone (**2a**, 58  $\mu$ L, 0.5 mmol). The residue was purified by column chromatography on silica gel (petroleum ether/EtOAc = 200:1) afforded the product **3p** as white solid (62 mg, 55%).

<sup>1</sup>H NMR (400 MHz, CDCl<sub>3</sub>, ppm)  $\delta$  8.12-8.11 (m, 2H), 7.75-7.72 (m, 1H), 7.50-7.49 (m, 3H), 7.29-7.27 (m, 2H), 2.82 (s, 3H); <sup>13</sup>C NMR (100 MHz, CDCl<sub>3</sub>, ppm)  $\delta$  166.6, 153.5, 135.0, 134.0, 133.4, 130.7, 128.9, 127.5, 126.8, 125.1, 119.0, 18.4; MS (EI)  $m/z$  (%) 225 (100), 193, 121, 77, 69.

**5-Chloro-2-phenylbenzo[d]thiazole (3r, CAS: 952-16-9)**<sup>[5]</sup>

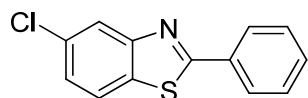

The reaction was conducted with 2-amino-4-chlorobenzenethiol (**1g**, 143.7 mg, 0.9 mmol) and acetophenone (**2a**, 58  $\mu$ L, 0.5 mmol). The residue was purified by column chromatography on



silica gel (petroleum ether/EtOAc = 50:1) afforded the product **3r** as white solid (86 mg, 70%).

<sup>1</sup>H NMR (400 MHz, CDCl<sub>3</sub>, ppm) δ 8.09-8.06 (m, 3H), 7.82 (d, *J* = 8.4 Hz, 1H), 7.51-7.50 (m, 3H), 7.37 (d, *J* = 8.8 Hz, 1H); <sup>13</sup>C NMR (100 MHz, CDCl<sub>3</sub>, ppm) δ 169.9, 155.1, 133.4, 133.4, 132.4, 131.3, 129.1, 127.7, 125.7, 123.1, 122.3; MS (EI) *m/z* (%) 245 (100), 218, 142, 107, 77.

**6-Methoxy-2-(p-tolyl)benzo[d]thiazole (3s, CAS: 101078-51-7)**<sup>[12]</sup>

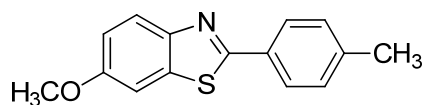

The reaction was conducted with 2-amino-5-methoxybenzenethiol (**1c**, 139.5 mg, 0.9 mmol) and 1-(p-tolyl)ethanone (**2e**, 66.8 μL, 0.5 mmol). The residue was purified by column chromatography on silica gel (petroleum ether/EtOAc = 10:1) afforded the product **3s** as white solid (97 mg, 76%).

<sup>1</sup>H NMR (400 MHz, CDCl<sub>3</sub>, ppm) δ 7.93 (d, *J* = 8.4 Hz, 3H), 7.35 (s, 1H), 7.27 (t, *J* = 6.4 Hz, 2H), 7.09 (t, *J* = 8.8 Hz, 1H), 3.89 (s, 3H), 2.42 (s, 3H); <sup>13</sup>C NMR (100 MHz, CDCl<sub>3</sub>, ppm) δ 165.7, 157.6, 148.7, 140.8, 136.2, 131.1, 129.6, 127.1, 123.5, 115.4, 104.1, 55.7, 21.4. MS (EI) *m/z* (%) 255 (100), 240, 212, 95, 69.

**6-Methoxy-2-(4-methoxyphenyl)benzo[d]thiazole (3t, CAS: 10205-70-6)**<sup>[13]</sup>

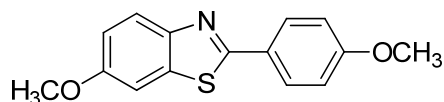

The reaction was conducted with 2-amino-5-methoxybenzenethiol (**1c**, 139.5 mg, 0.9 mmol) and 1-(4-methoxyphenyl)ethanone (**2f**, 75 mg, 0.5 mmol). The residue was purified by column chromatography on silica gel (petroleum ether/EtOAc = 20:1) afforded the product **3t** as white solid (108.4 mg, 80%).

<sup>1</sup>H NMR (400 MHz, CDCl<sub>3</sub>, ppm) δ 7.98 (d, *J* = 8.4 Hz, 2H), 7.91 (d, *J* = 9.2 Hz, 1H), 7.34 (s, 1H), 7.08-7.06 (m, 1H), 6.99 (d, *J* = 8.8 Hz, 2H), 3.89 (s, 3H), 3.88 (s, 3H); <sup>13</sup>C NMR (100 MHz, CDCl<sub>3</sub>, ppm) δ 165.4, 161.6, 157.5, 148.8, 136.2, 128.7, 126.6, 123.3, 115.3, 114.3, 104.3, 55.8, 55.4. MS (EI) *m/z* (%) 271 (100), 256, 228, 213, 95, 70.

**2-(4-Fluorophenyl)-6-methoxybenzo[d]thiazole (3u)**<sup>[13]</sup>

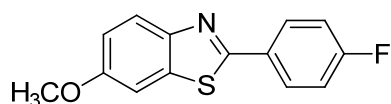

The reaction was conducted with 2-amino-5-methoxybenzenethiol (**1c**, 139.5 mg, 0.9 mmol) and 1-(4-fluorophenyl)ethanone (**2g**, 60.6  $\mu$ L, 0.5 mmol). The residue was purified by column chromatography on silica gel (petroleum ether/EtOAc = 10:1) afforded the product **3u** as white solid (91 mg, 70%).

$^1\text{H}$  NMR (400 MHz,  $\text{CDCl}_3$ , ppm)  $\delta$  8.05-8.01 (m, 2H), 7.93 (d,  $J$  = 8.4 Hz, 1H), 7.35 (s, 1H), 7.17 (t,  $J$  = 8.6 Hz, 2H), 7.10 (d,  $J$  = 6.4 Hz, 1H), 3.90 (s, 3H);  $^{13}\text{C}$  NMR (100 MHz,  $\text{CDCl}_3$ , ppm)  $\delta$  164.2, 164.1(d,  $J$  = 249.7 Hz), 157.8, 148.6, 136.4, 130.1 (d,  $J$  = 3.4 Hz), 129.1 (d,  $J$  = 8.6 Hz), 123.6, 116.0 (d,  $J$  = 21.9 Hz), 115.7, 104.2, 55.8. MS (EI)  $m/z$  (%) 259 (100), 244, 216, 95, 69.

**2-(4-Chlorophenyl)-6-methoxybenzo[d]thiazole (3v, CAS: 92161-47-2)<sup>[13]</sup>**

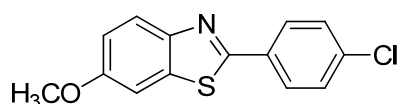

The reaction was conducted with 2-amino-5-methoxybenzenethiol (**1c**, 139.5 mg, 0.9 mmol) and 1-(4-chlorophenyl)ethanone (**2h**, 65  $\mu$ L, 0.5 mmol). The residue was purified by column chromatography on silica gel (petroleum ether/EtOAc = 15:1) afforded the product **3v** as white solid (93.7 mg, 68%).

$^1\text{H}$  NMR (400 MHz,  $\text{CDCl}_3$ , ppm)  $\delta$  7.99-7.93 (m, 3H), 7.45 (d,  $J$  = 8.4 Hz, 2H), 7.35 (s, 1H), 7.11-7.09 (m, 1H), 3.90 (s, 3H);  $^{13}\text{C}$  NMR (100 MHz,  $\text{CDCl}_3$ , ppm)  $\delta$  164.0, 158.0, 148.7, 136.5, 136.5, 132.3, 129.2, 128.4, 123.8, 115.8, 104.2, 55.8. MS (EI)  $m/z$  (%) 275 (100), 260, 232, 95, 69.

## References

- [1] Duan, Z. Y.; Sadananda, R.; Liu, X. G. *Org. Lett.* **2010**, *12*, 2430.
- [2] Chakraborti, A. K.; Rudrawar, S.; Jadhav, K. B. *Green Chem.* **2007**, *9*, 1335.
- [3] Matsushita, H.; Lee, S. H.; Joung, M. *Tetrahedron Lett.* **2004**, *45*, 313.
- [4] Chen, R.; Liu, S. W.; Liu, X. H.; Yang, L.; Deng, G. J. *Org. Biomol. Chem.* **2011**, *9*, 7675.
- [5] Deng, H.; Li, Z.K.; Ke, F.; Zhou, X. G. *Chem.-Eur. J.* **2012**, *18*, 4840.
- [6] Liu, B.; Qin, X. R.; Li, K. Z. *Chem.-Eur. J.* **2010**, *16*, 11836.
- [7] Praveen, C.; Kumar, K. H.; Muralidharan, D. *Tetrahedron* **2008**, *64*, 2369.
- [8] Chakraborti, A. K.; Selvam, C.; Kaur, G.; Bhagat, S. *Synlett* **2004**, 851.
- [9] Yamamoto, T.; Muto, K.; Canivet, J.; Yamaguchi, J. *Chem.-Eur. J.* **2011**, *17*, 10113.
- [10] Wang, H. B.; Wang, L.; Shang, J. S. *Chem. Commun.* **2012**, *48*, 76.
- [11] Inamoto, K.; Hasegawa, C.; Hiroya, K. *Org. Lett.* **2008**, *10*, 5147.
- [12] Bose, D. S.; Idrees, M. J. *Org. Chem.* **2006**, *71*, 8261.
- [13] Auld, D. S.; Zhang, Y. Q.; Southall, N. T. *J. Med. Chem.* **2009**, *52*, 1450.

# $^1\text{H}$ NMR and $^{13}\text{C}$ NMR spectra

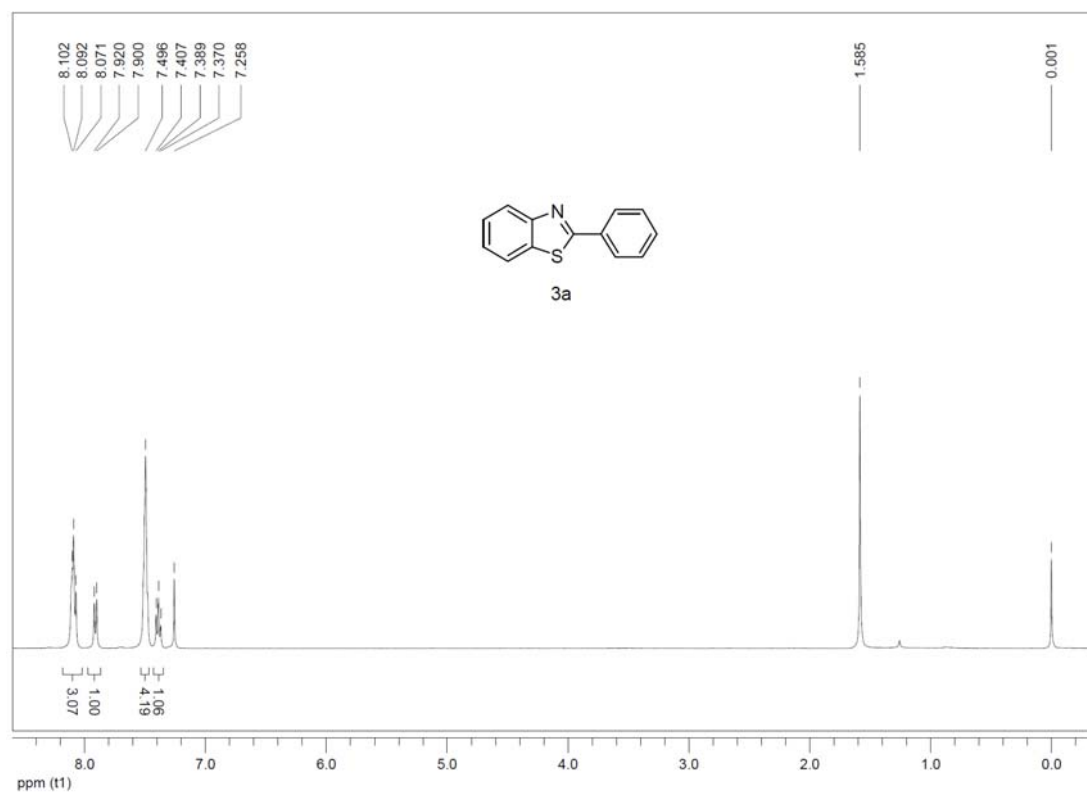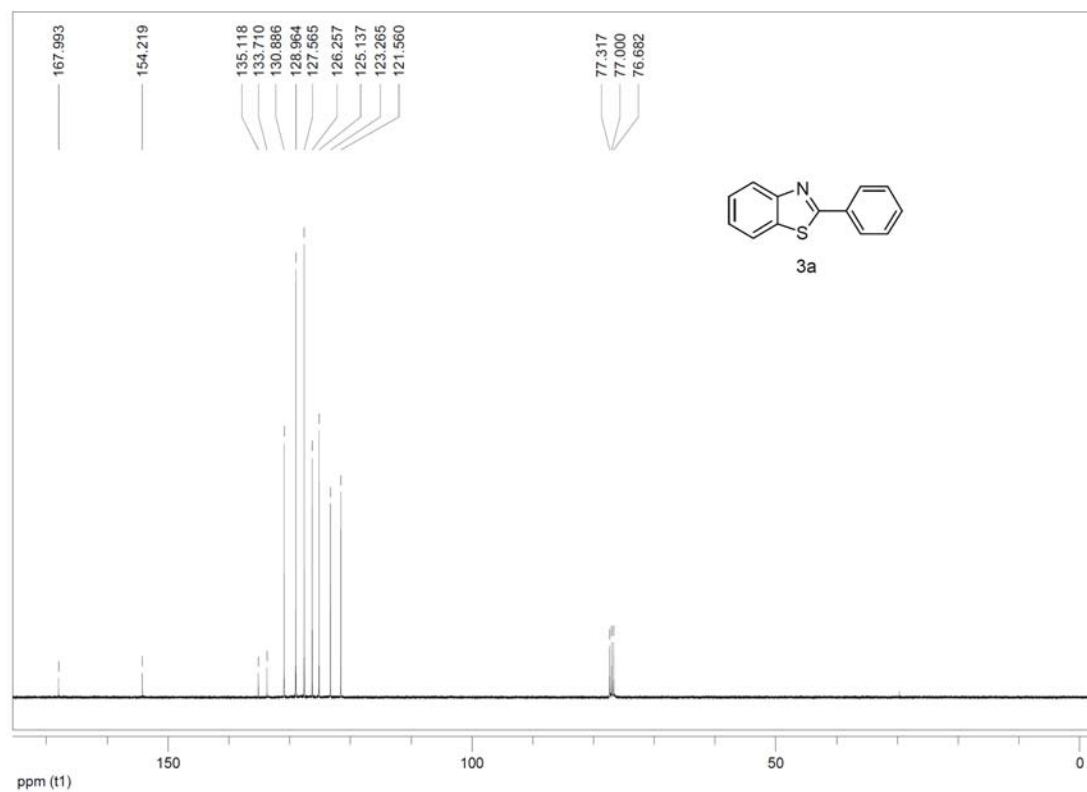

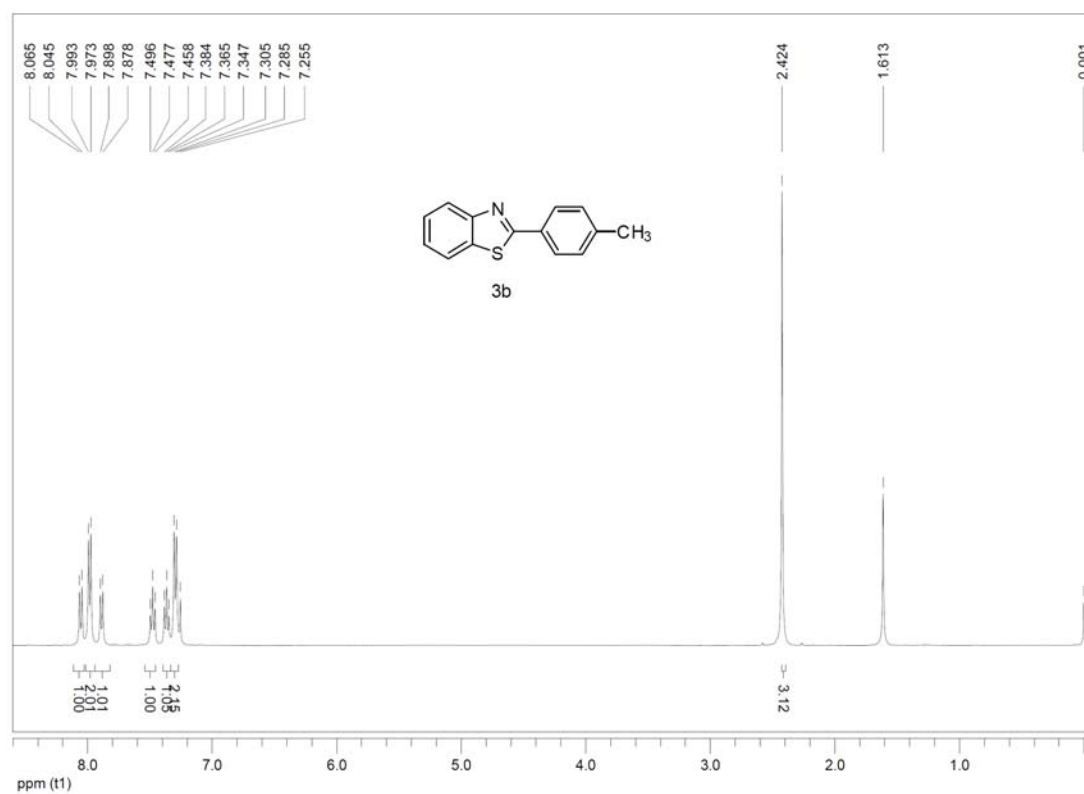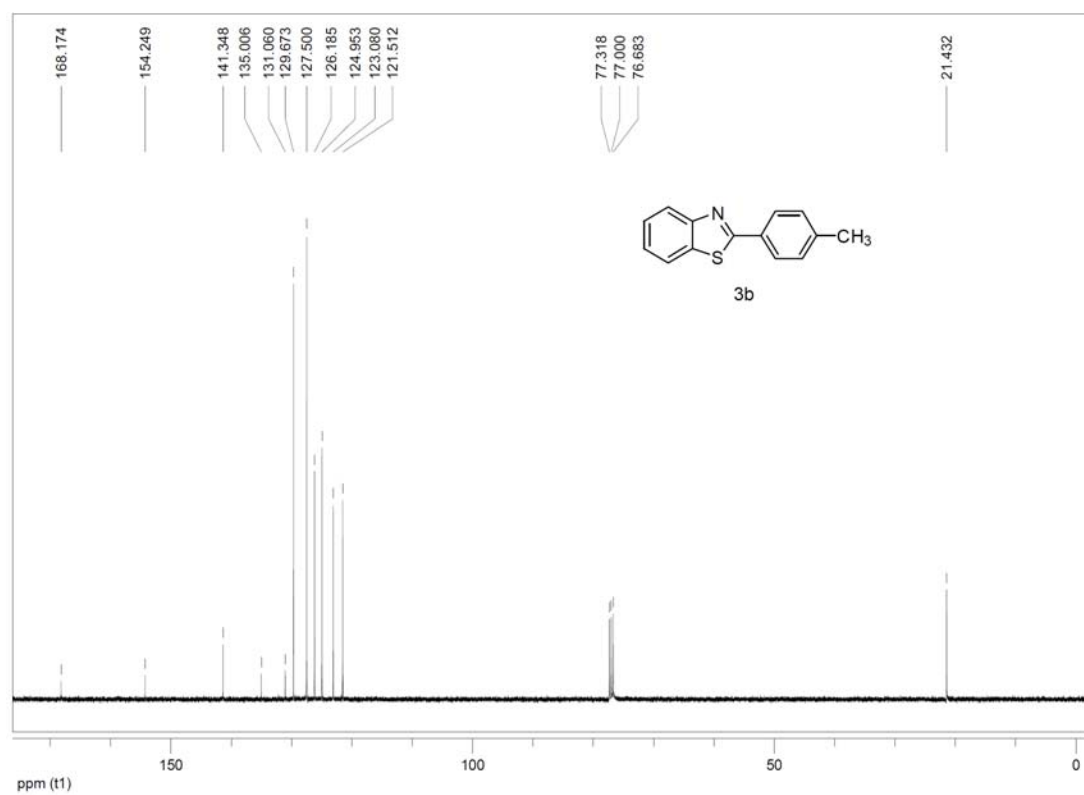

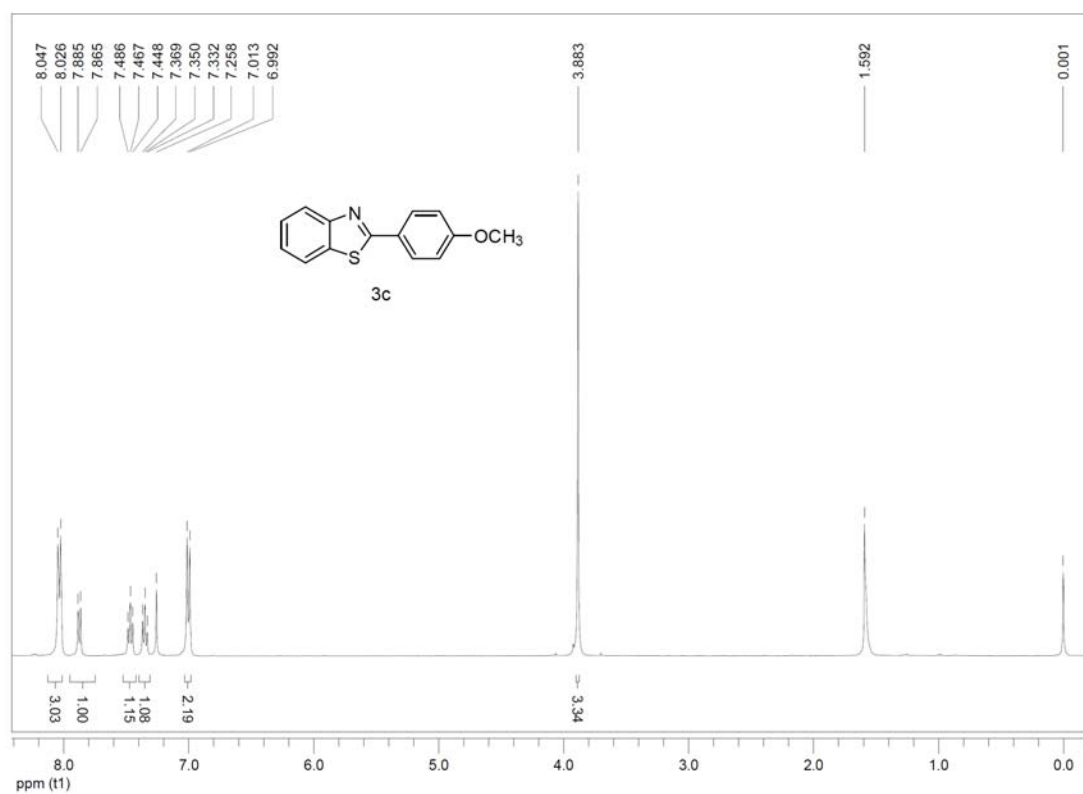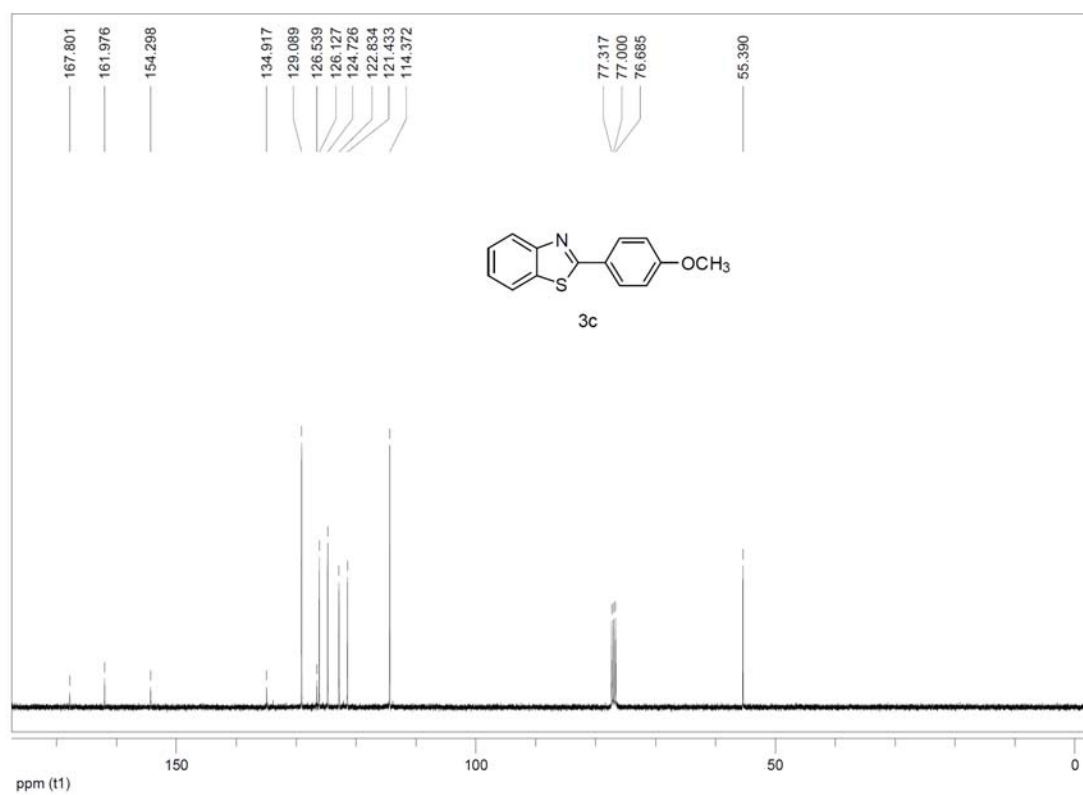

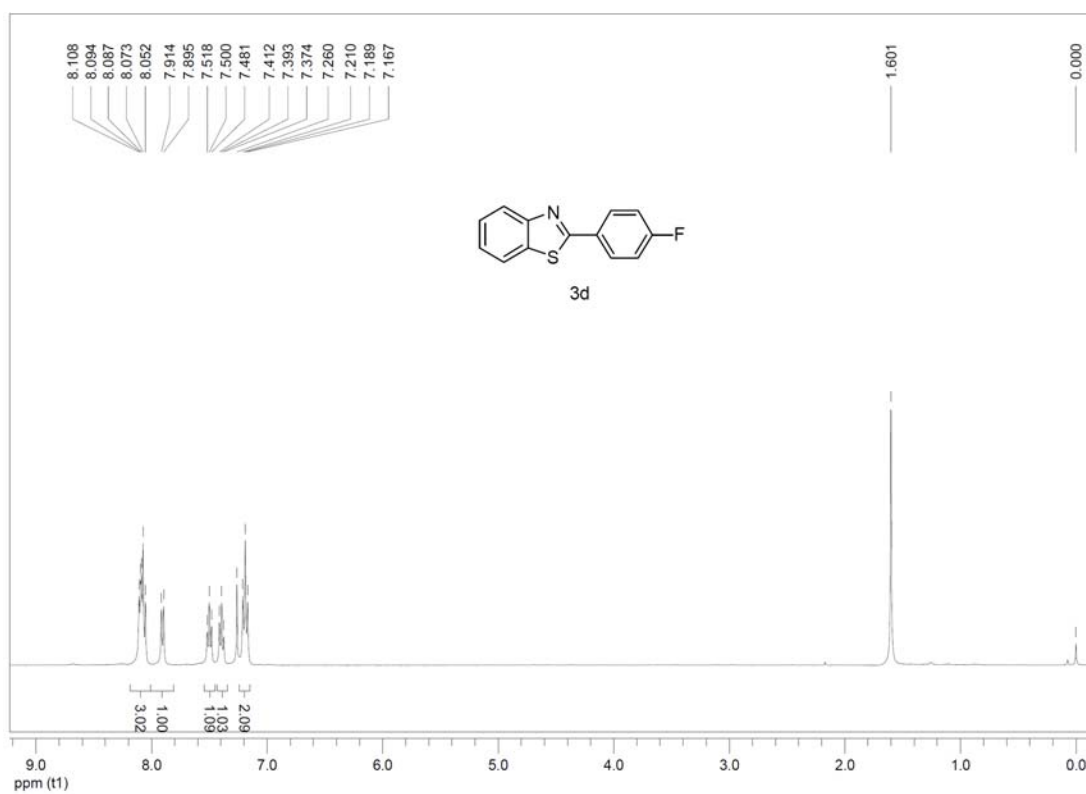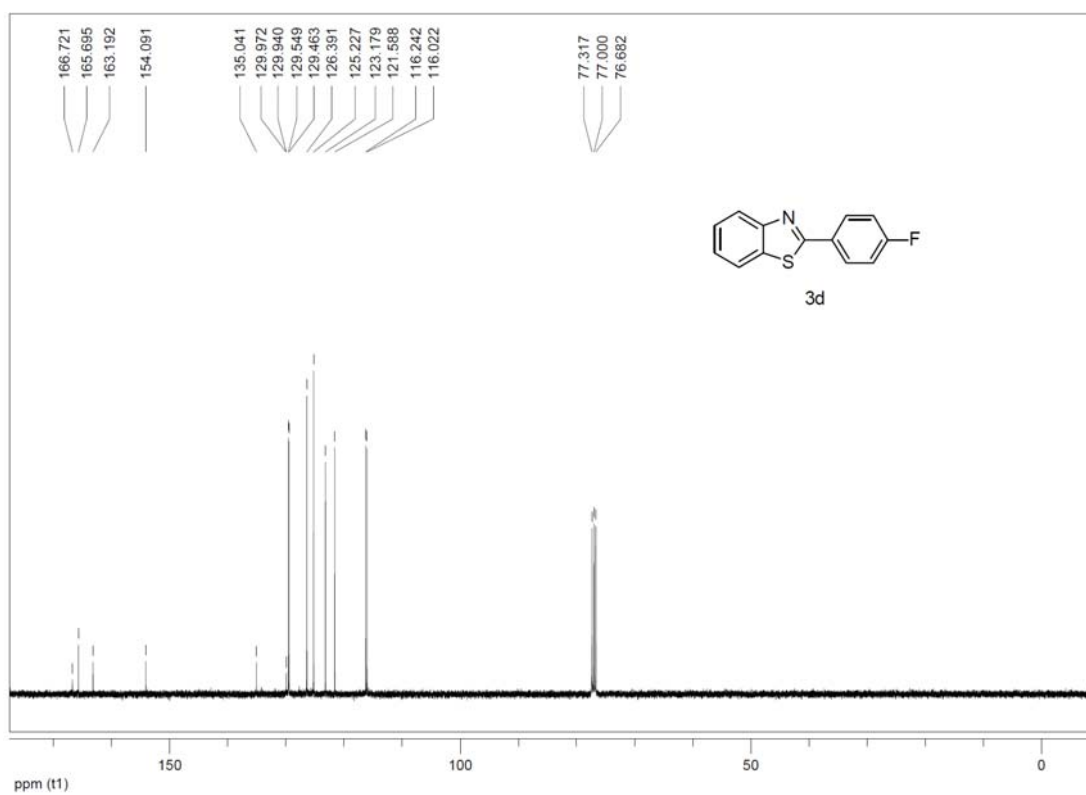

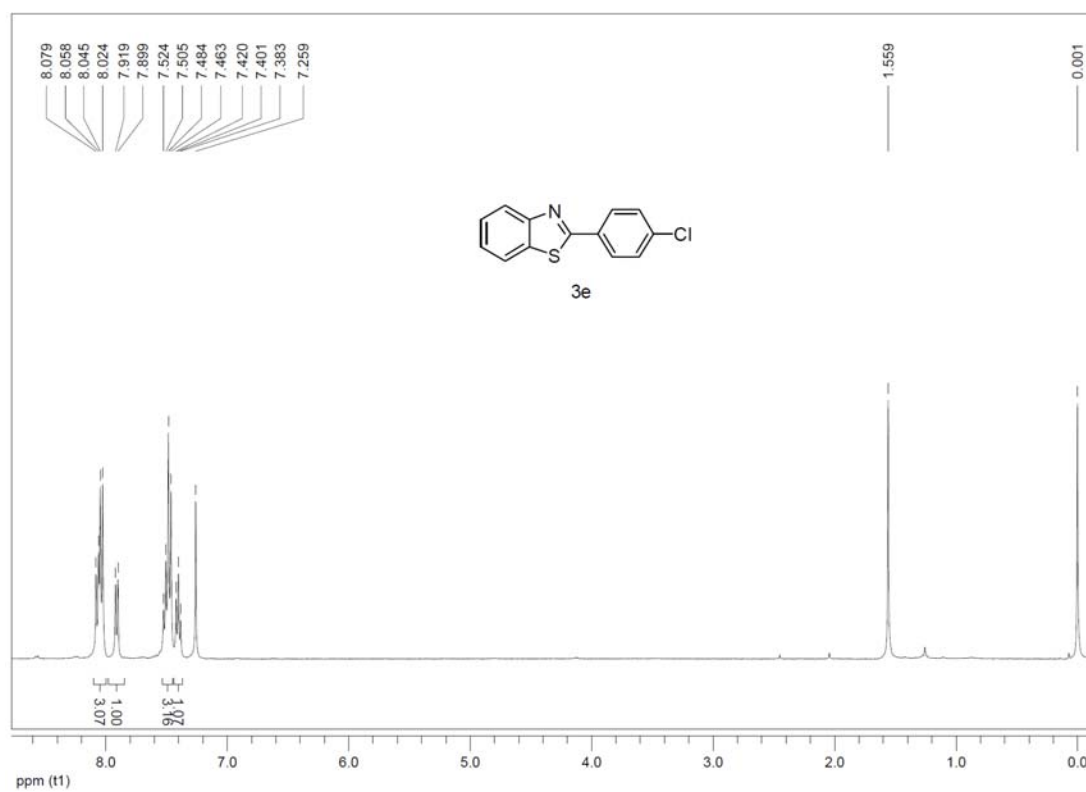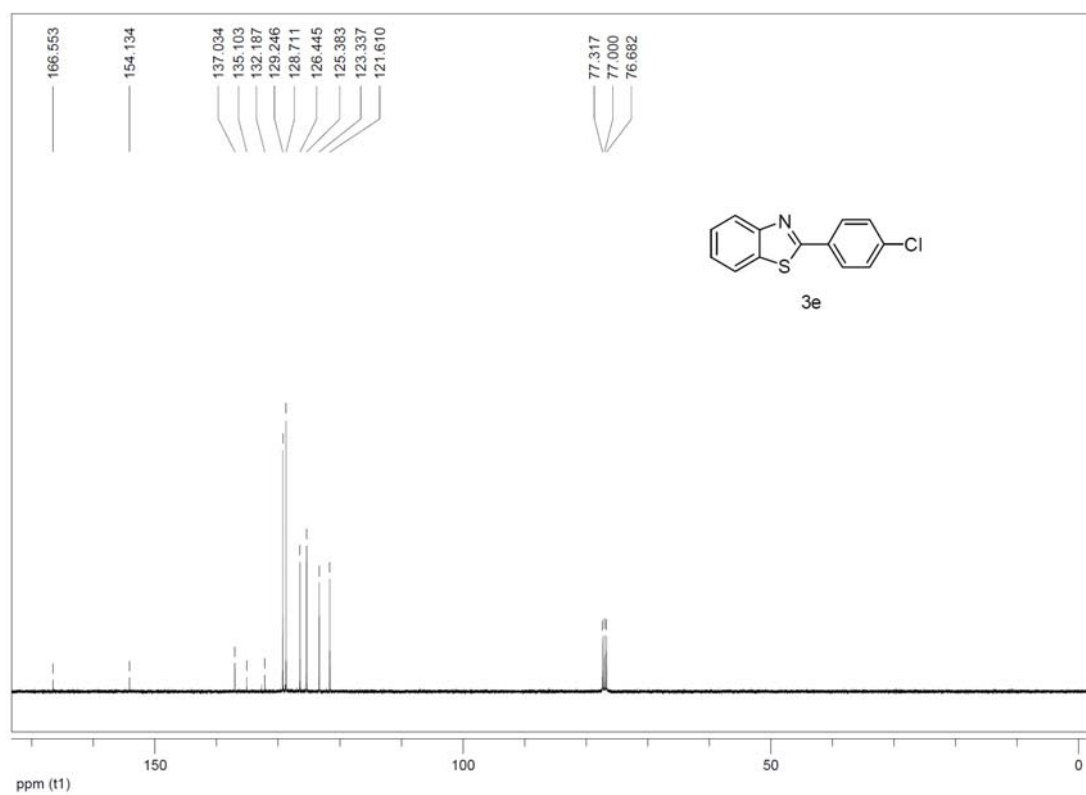



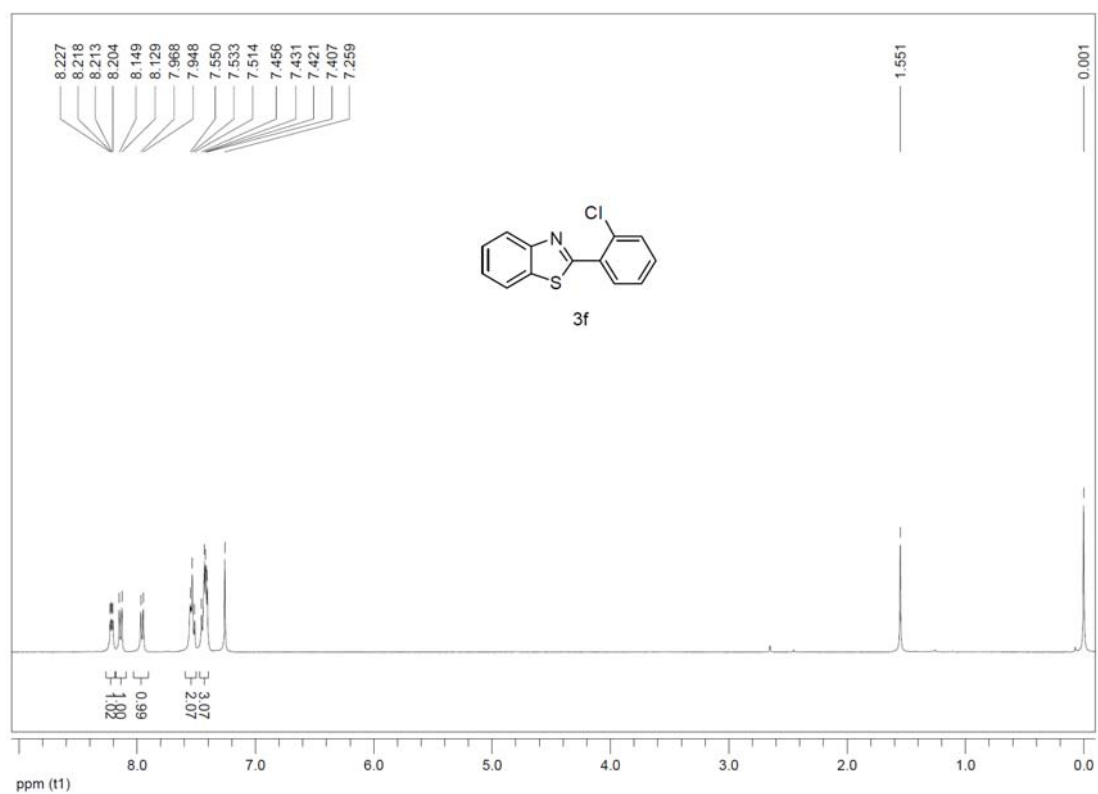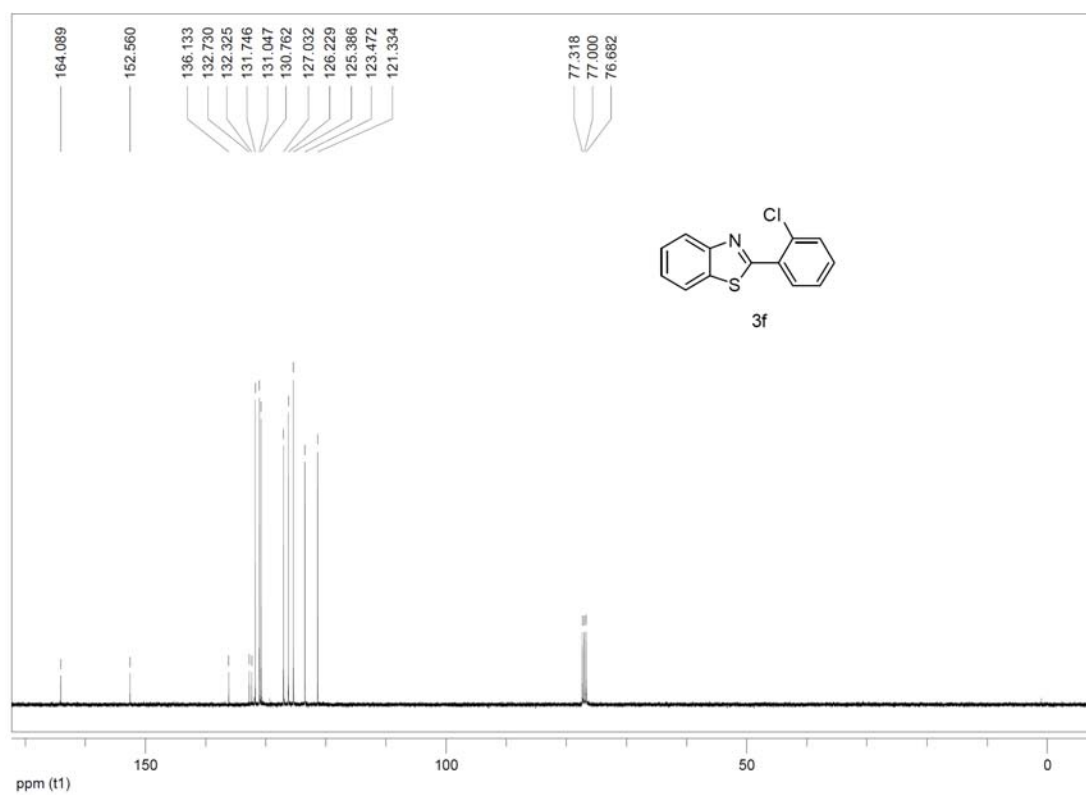



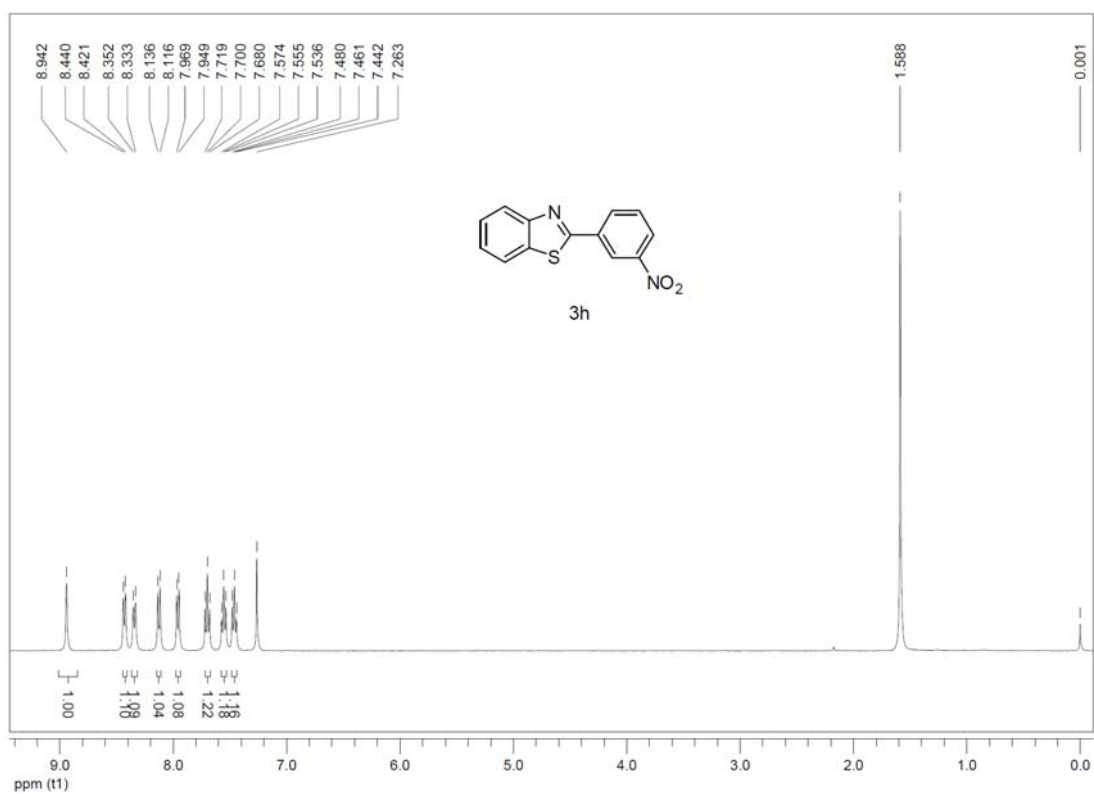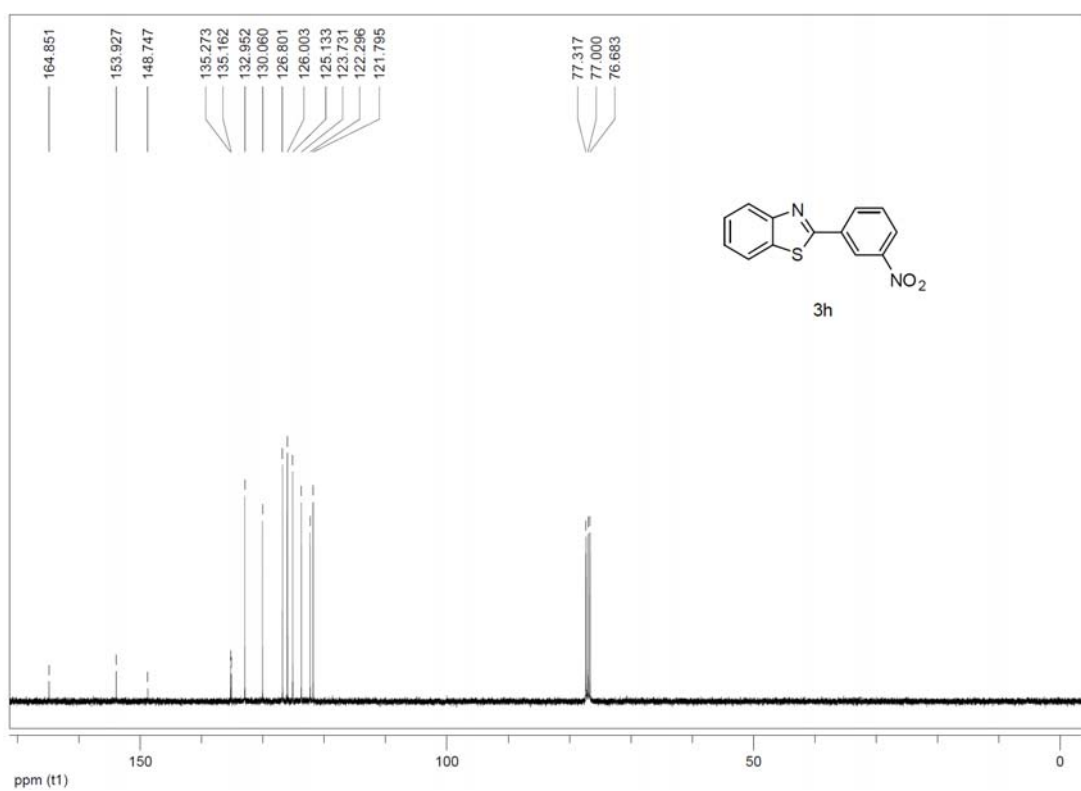

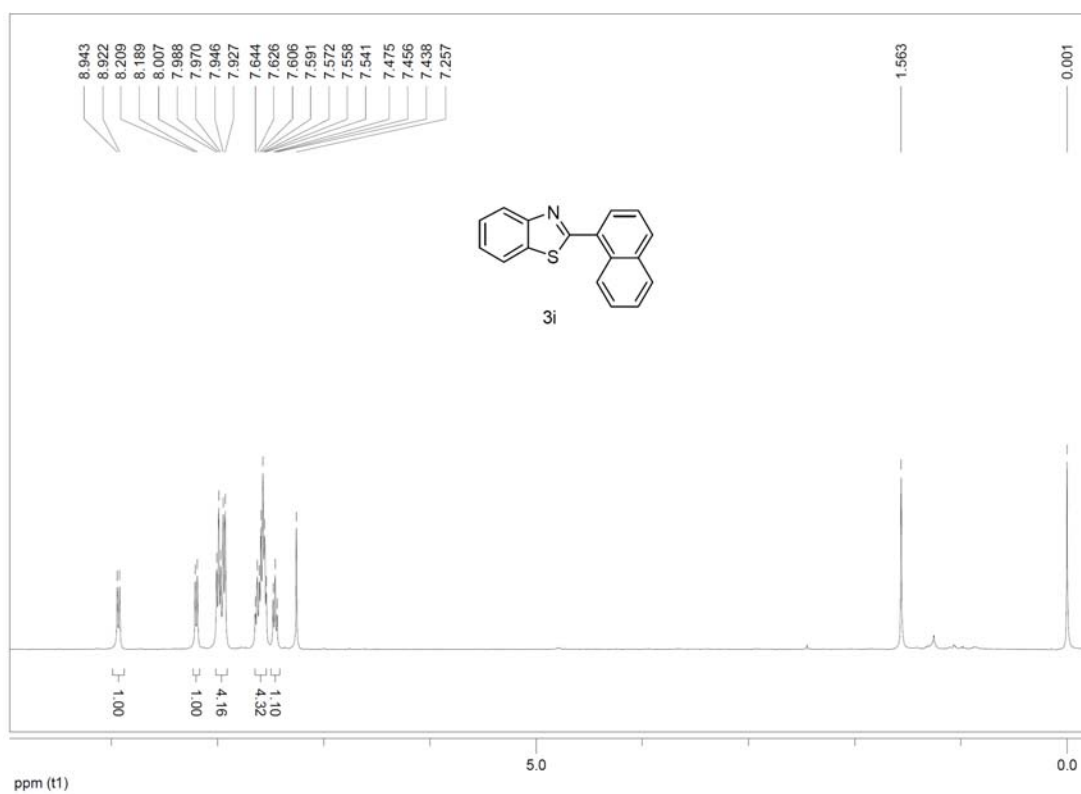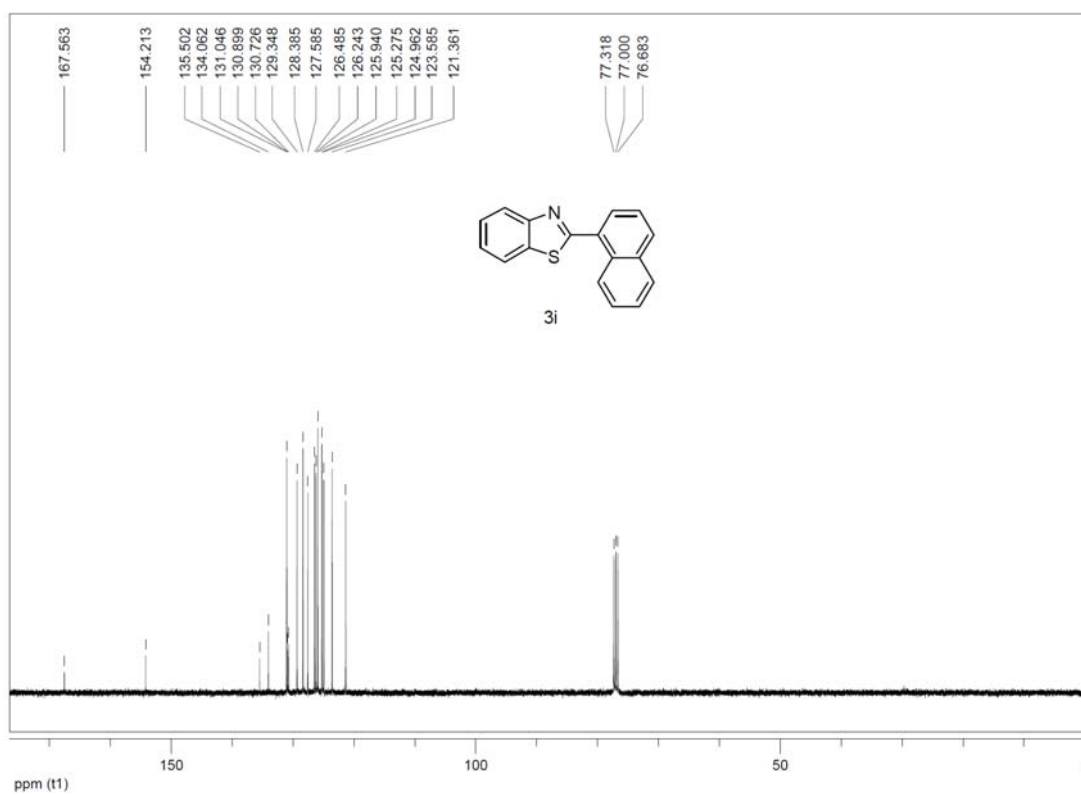

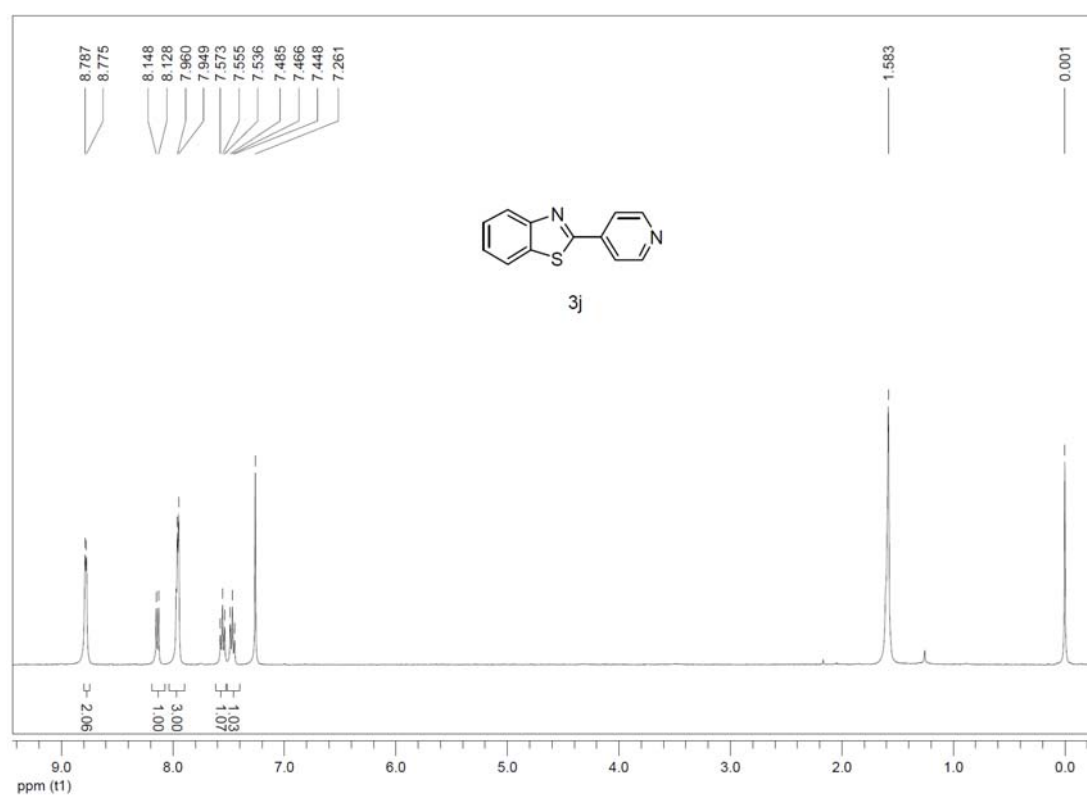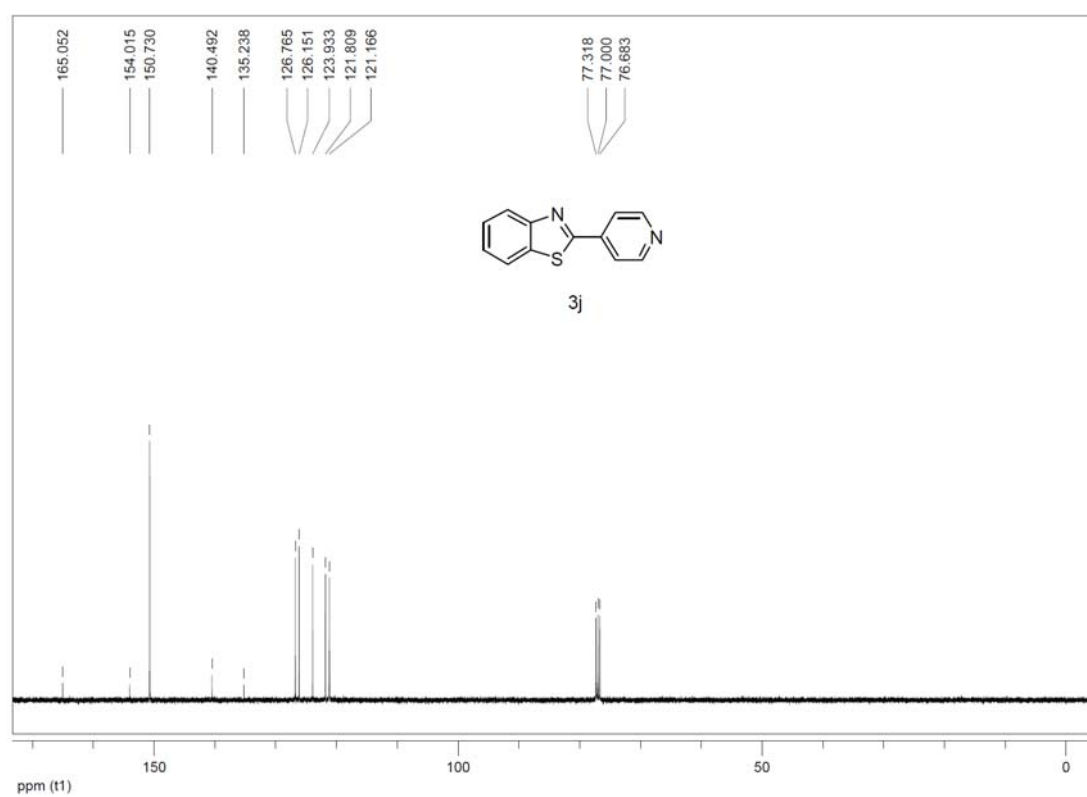

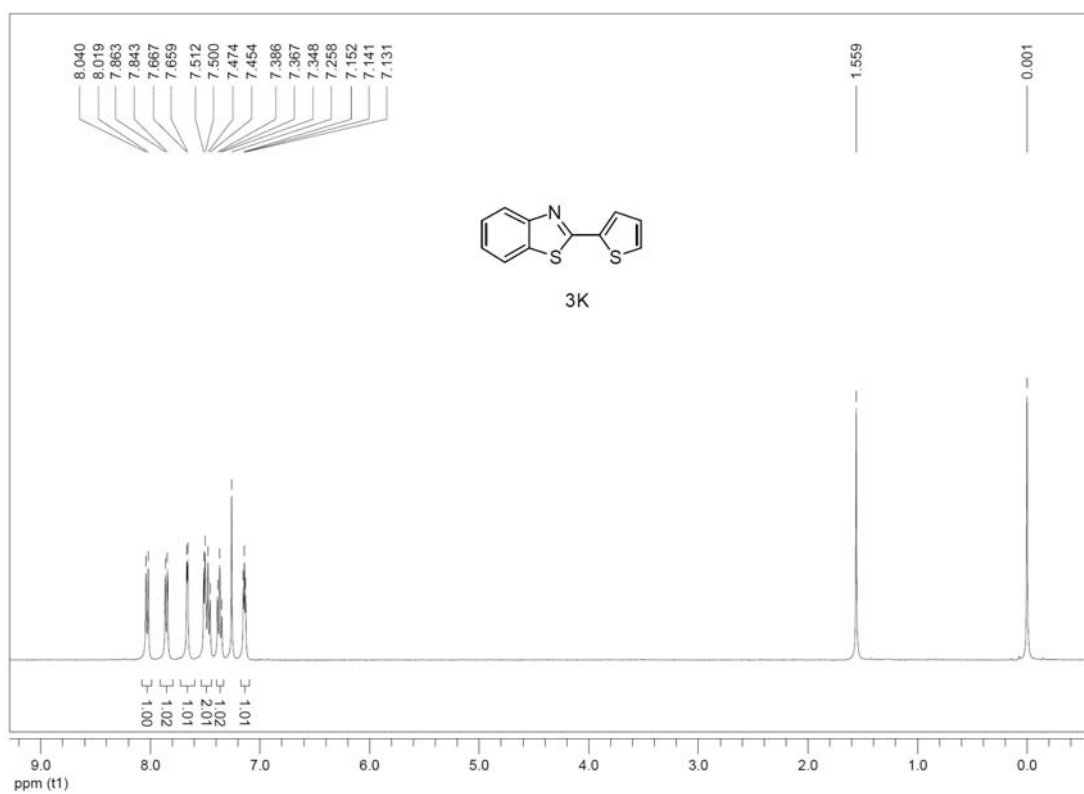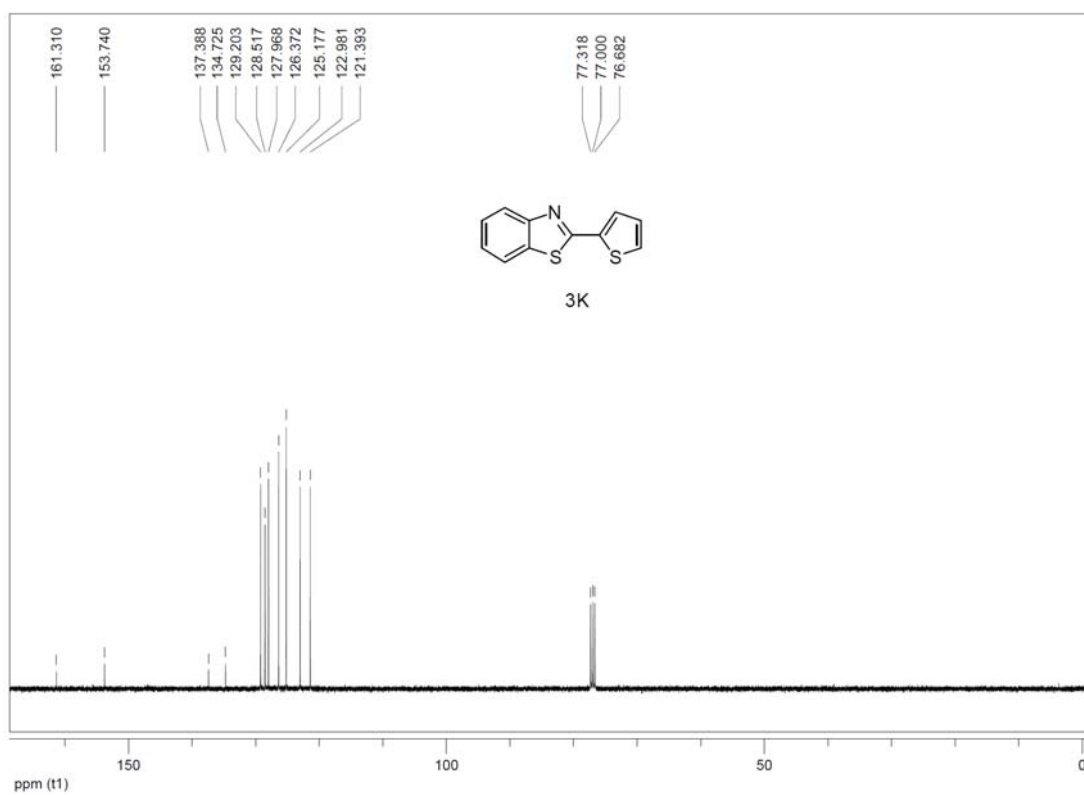

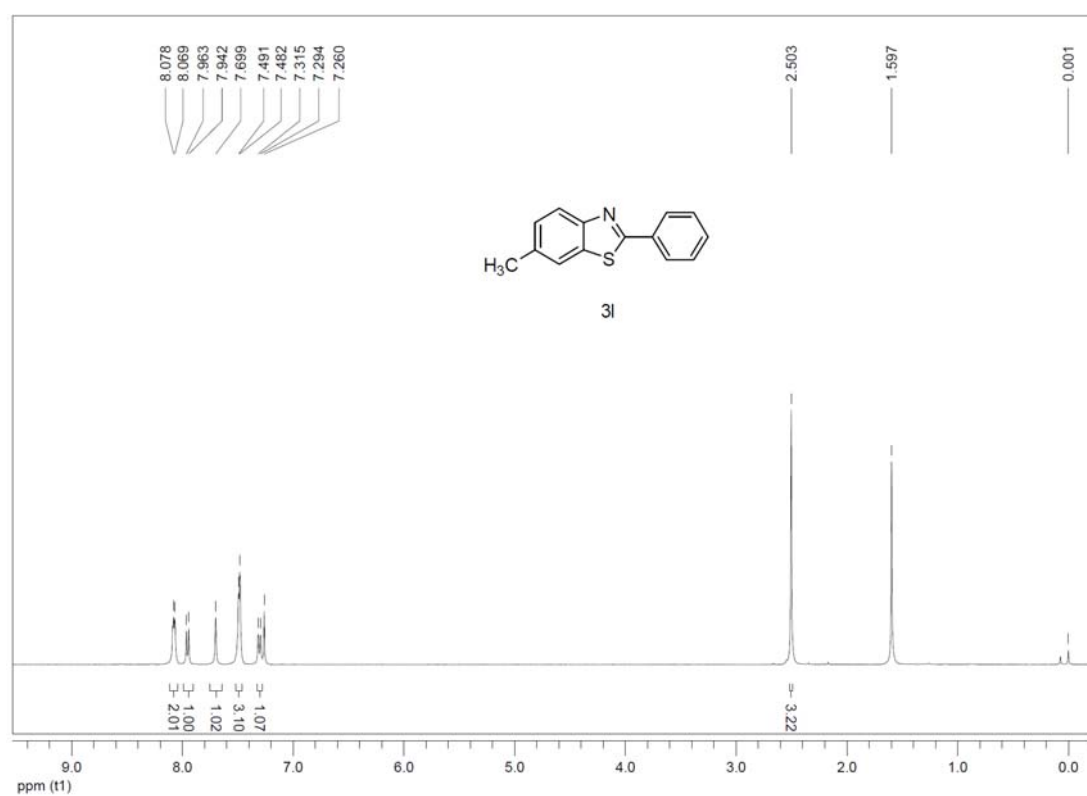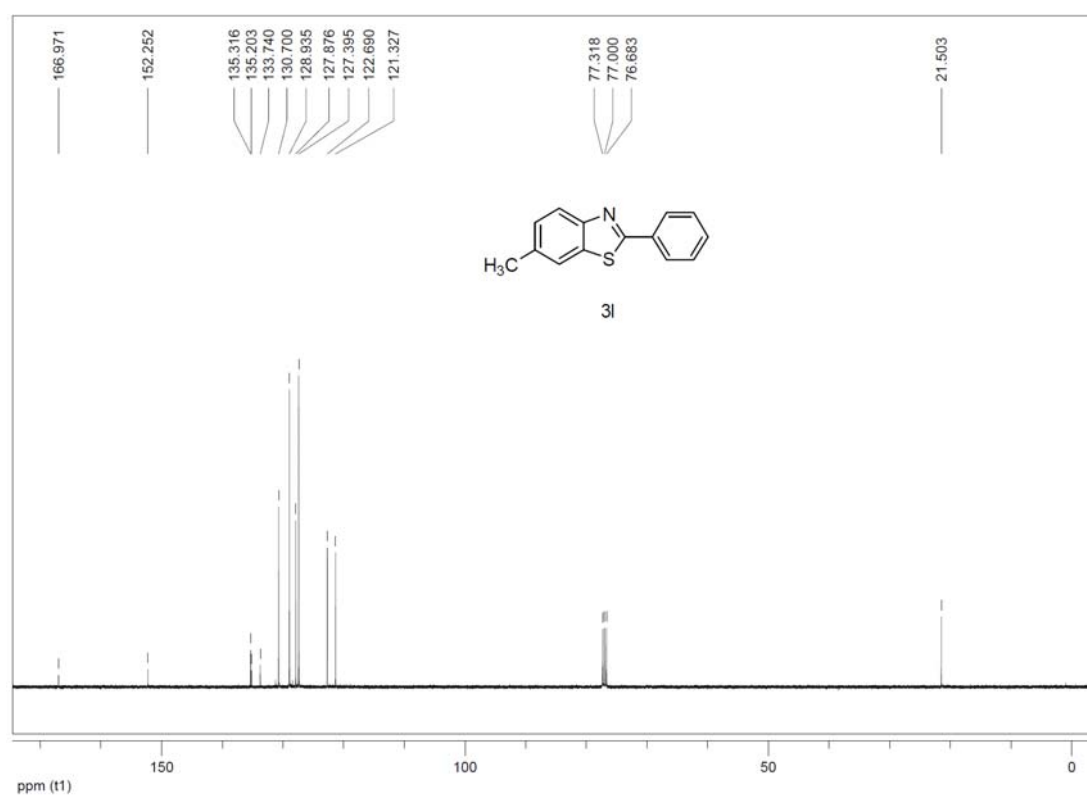

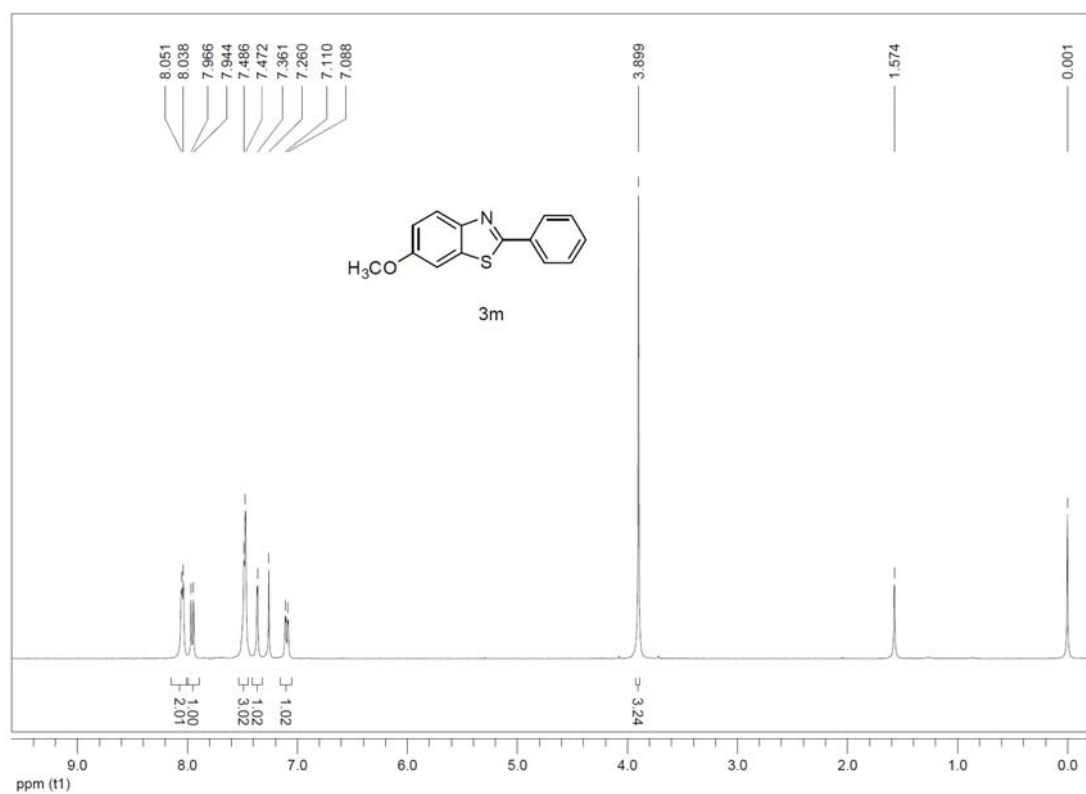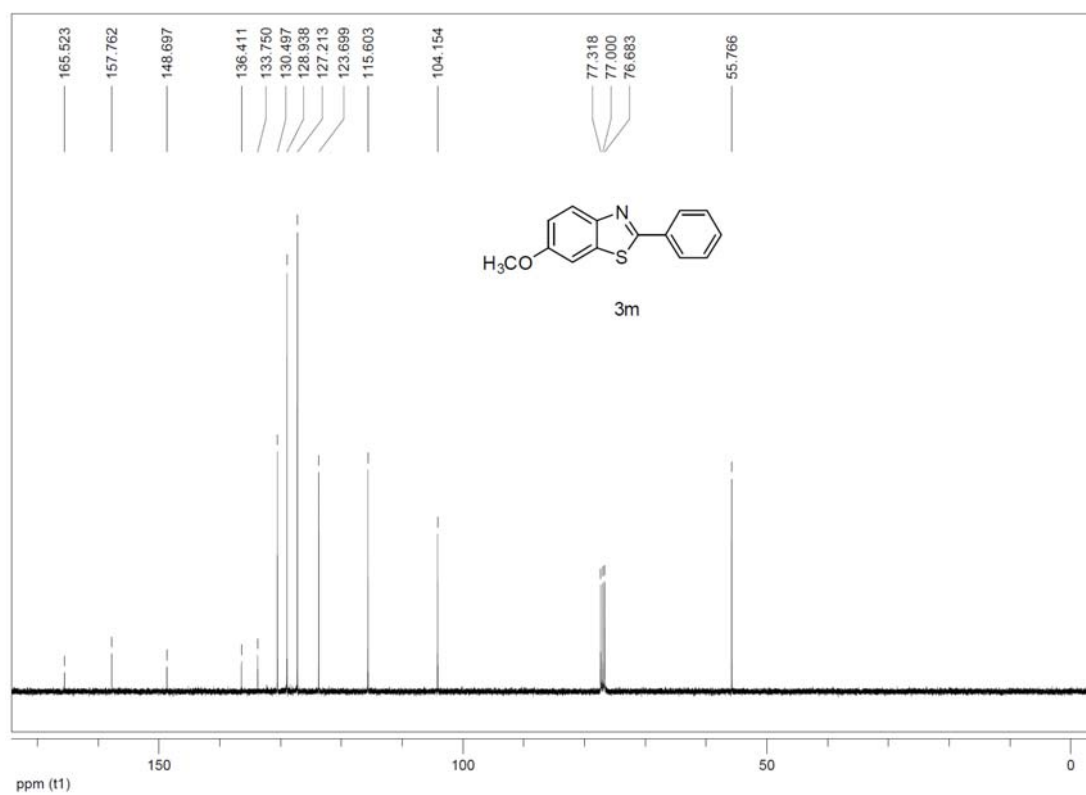



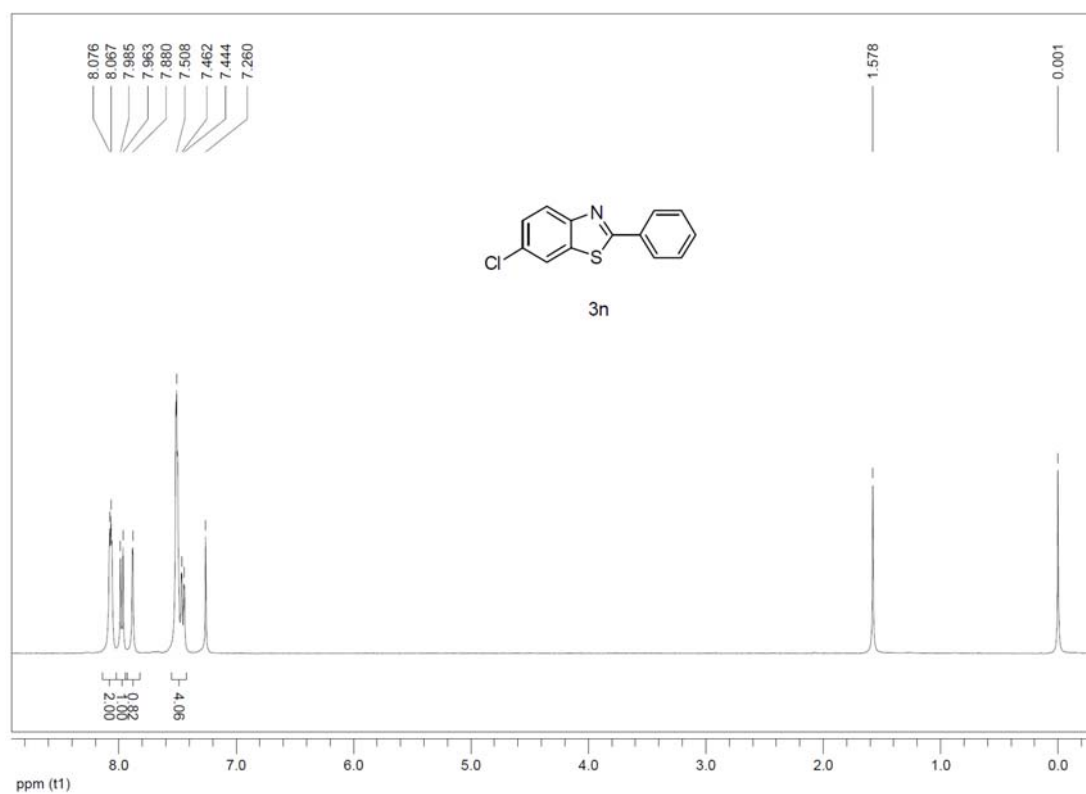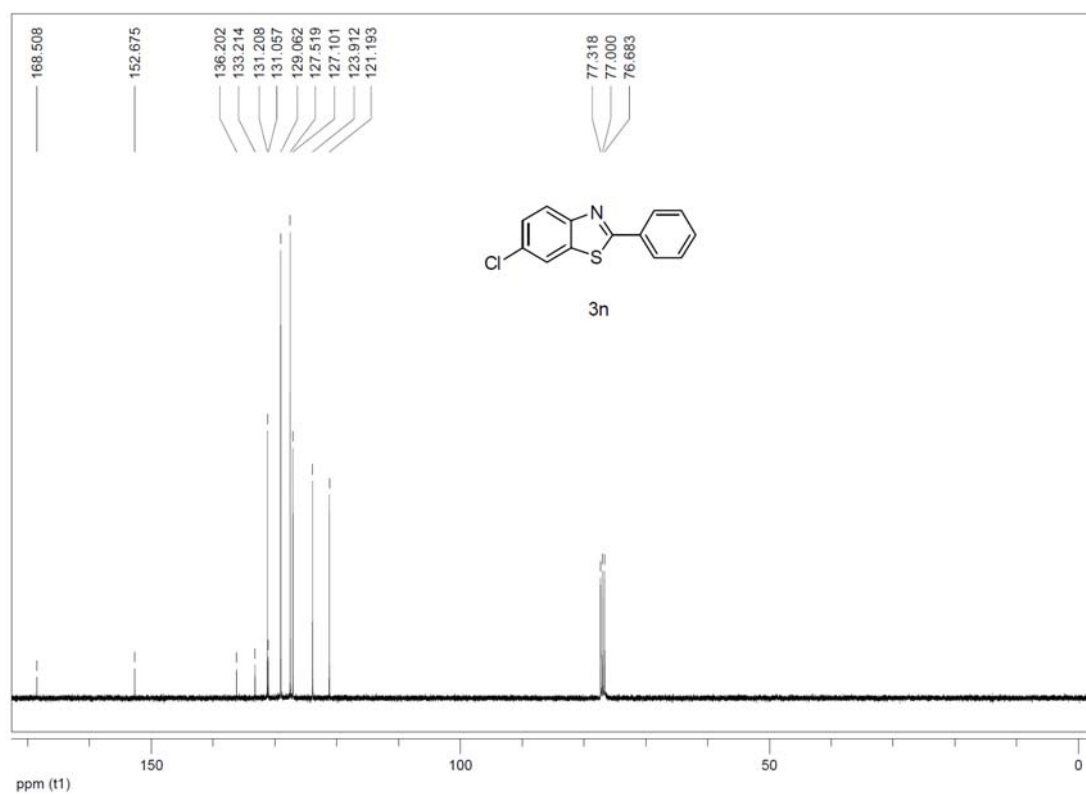

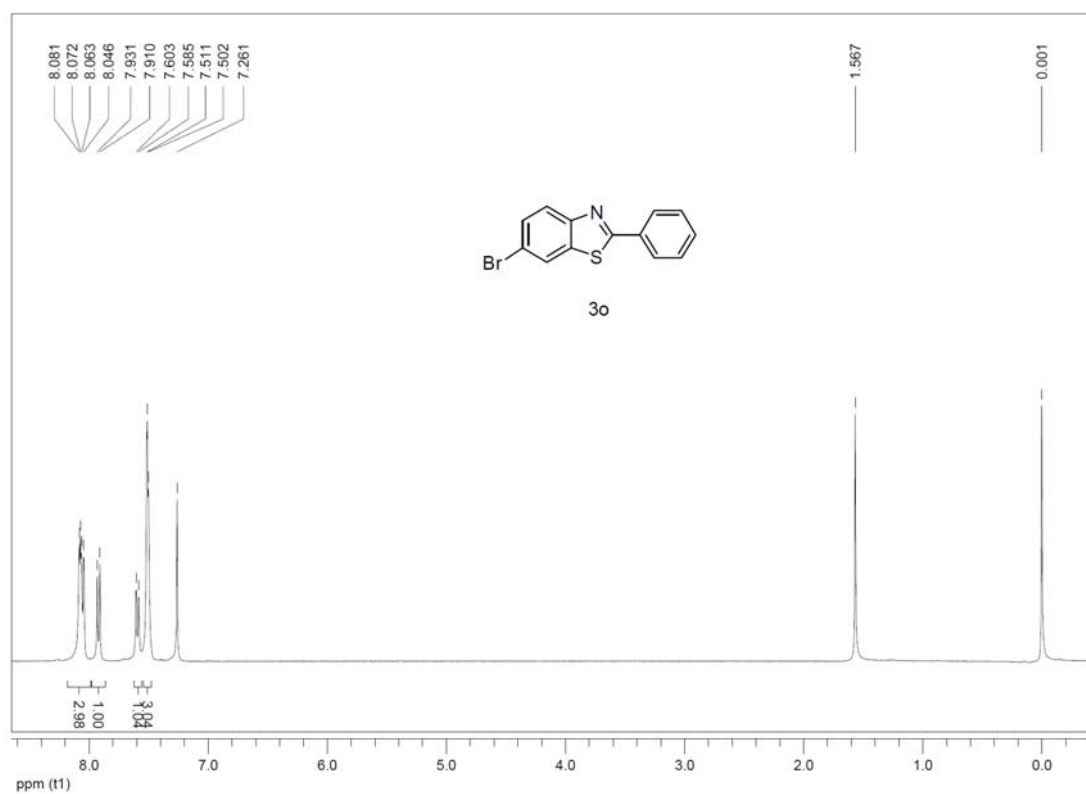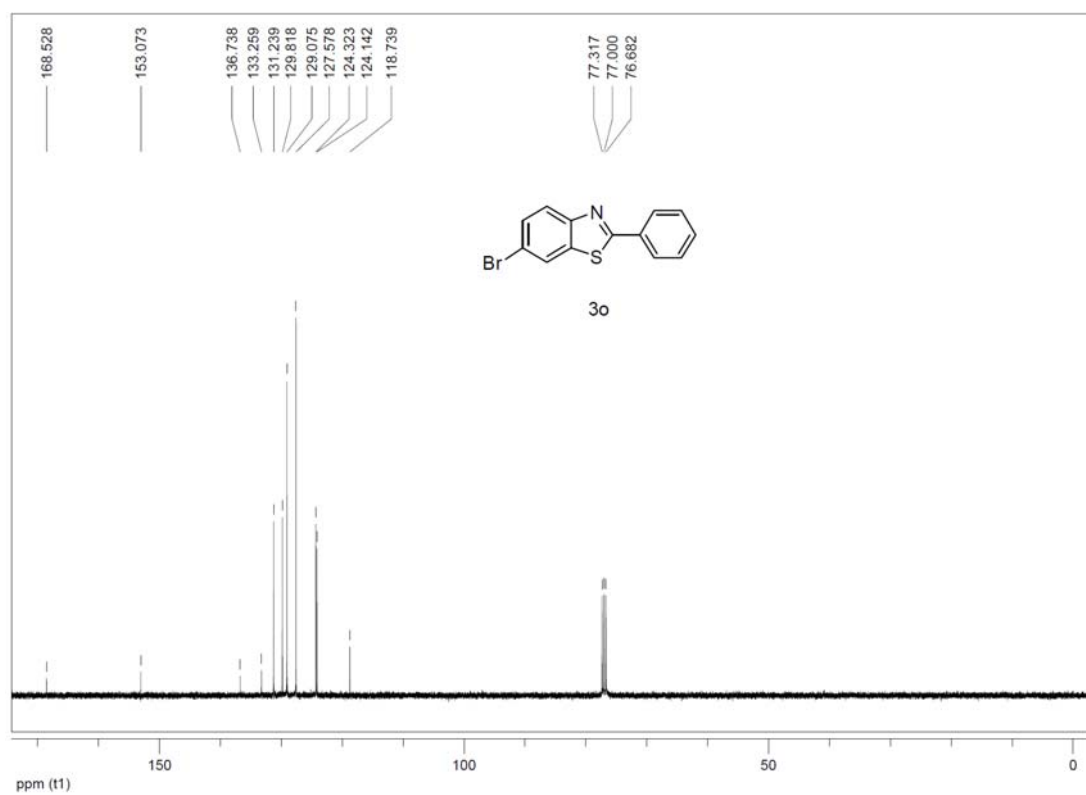

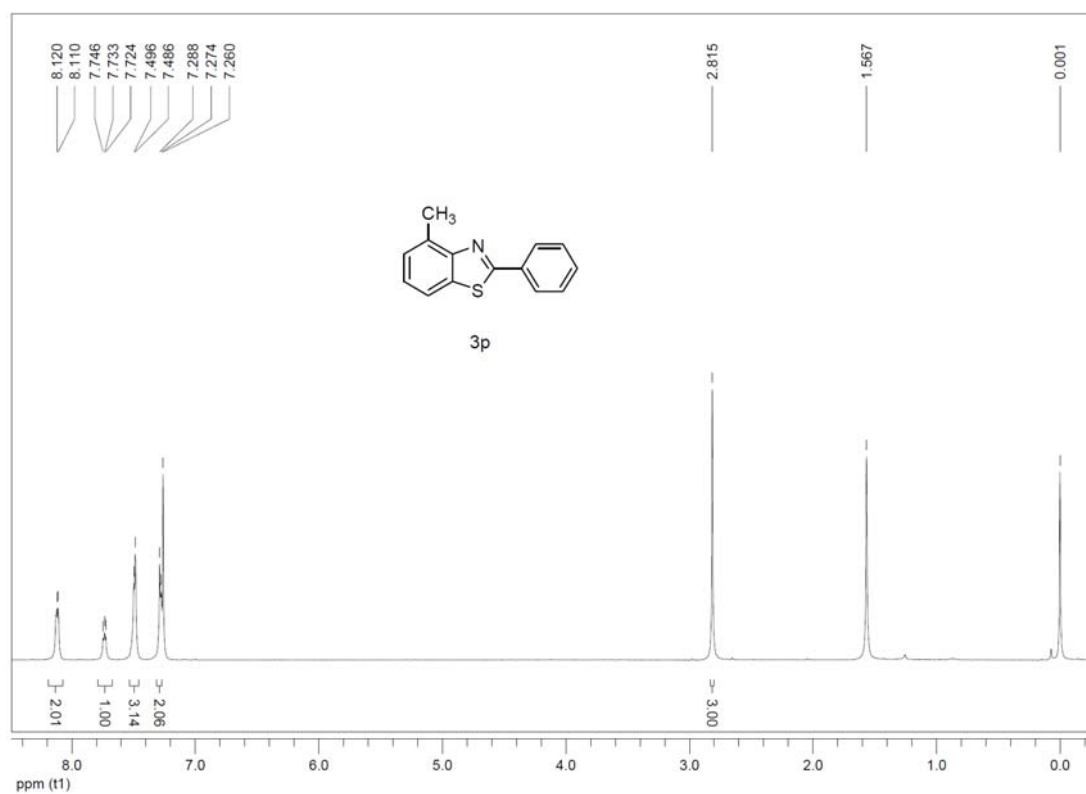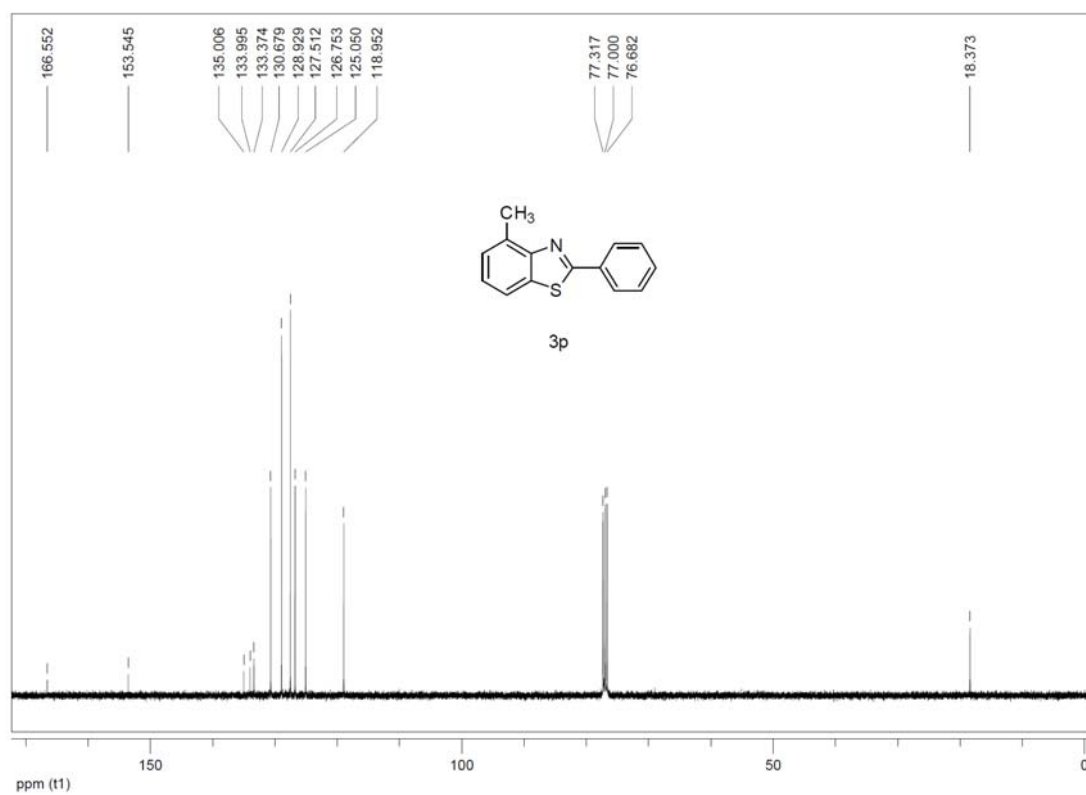

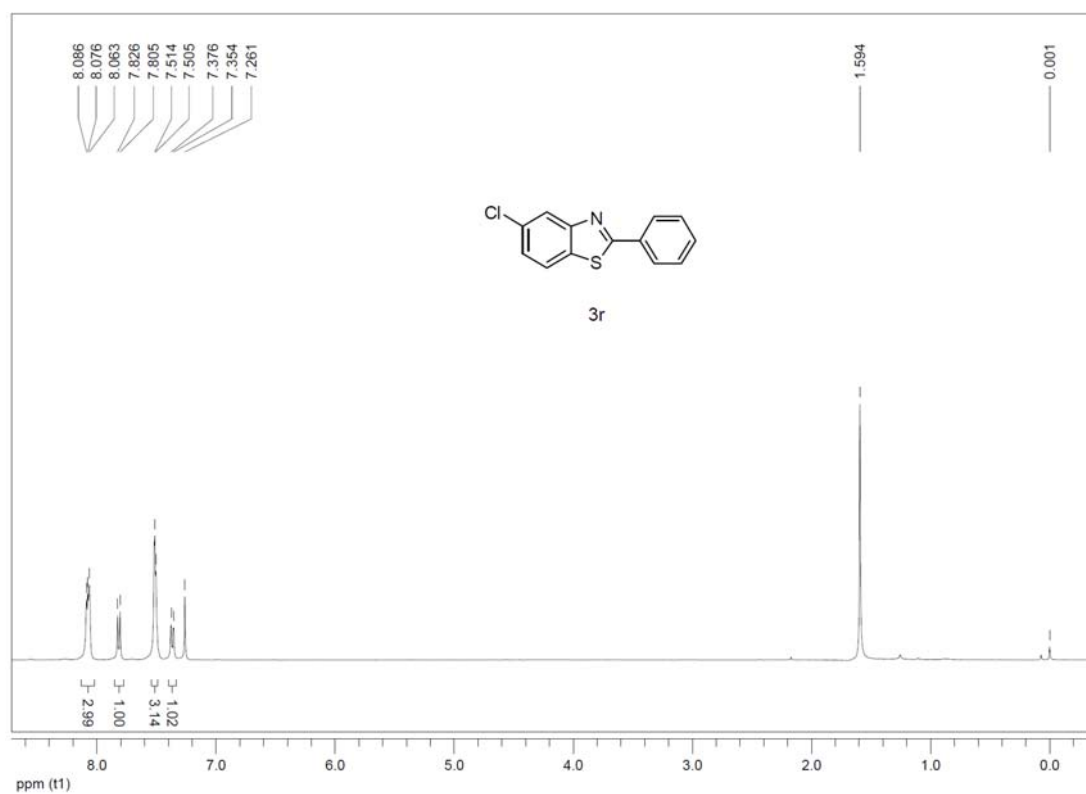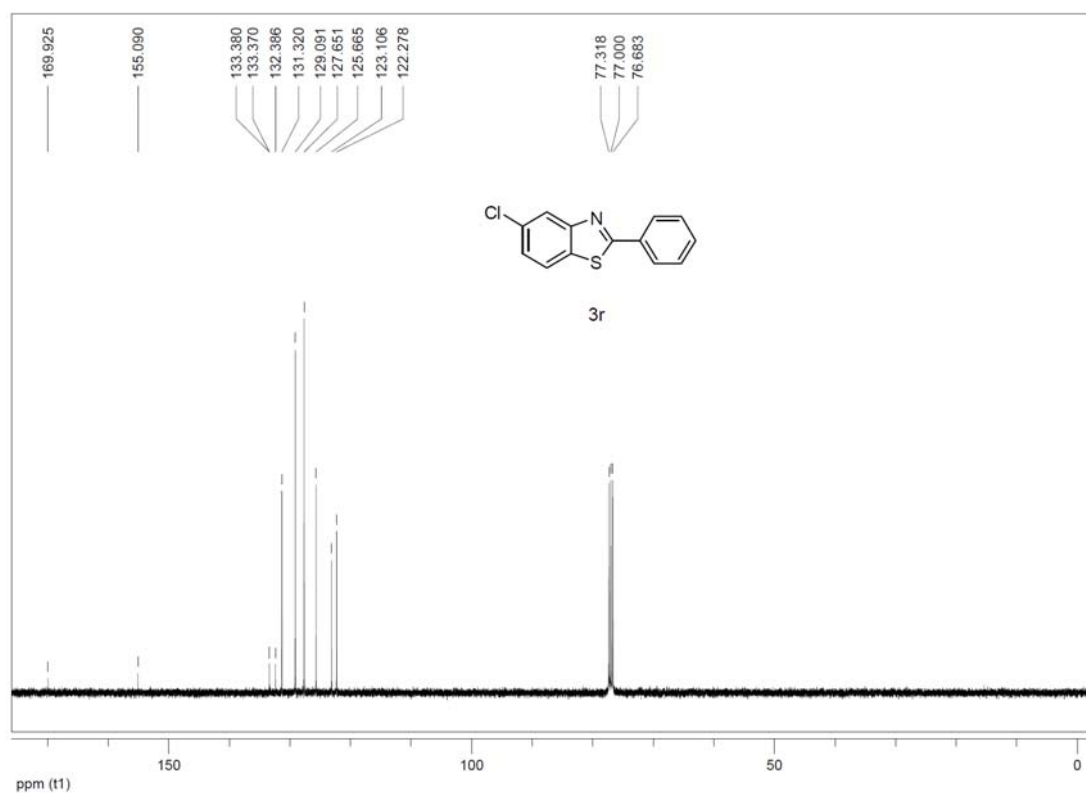

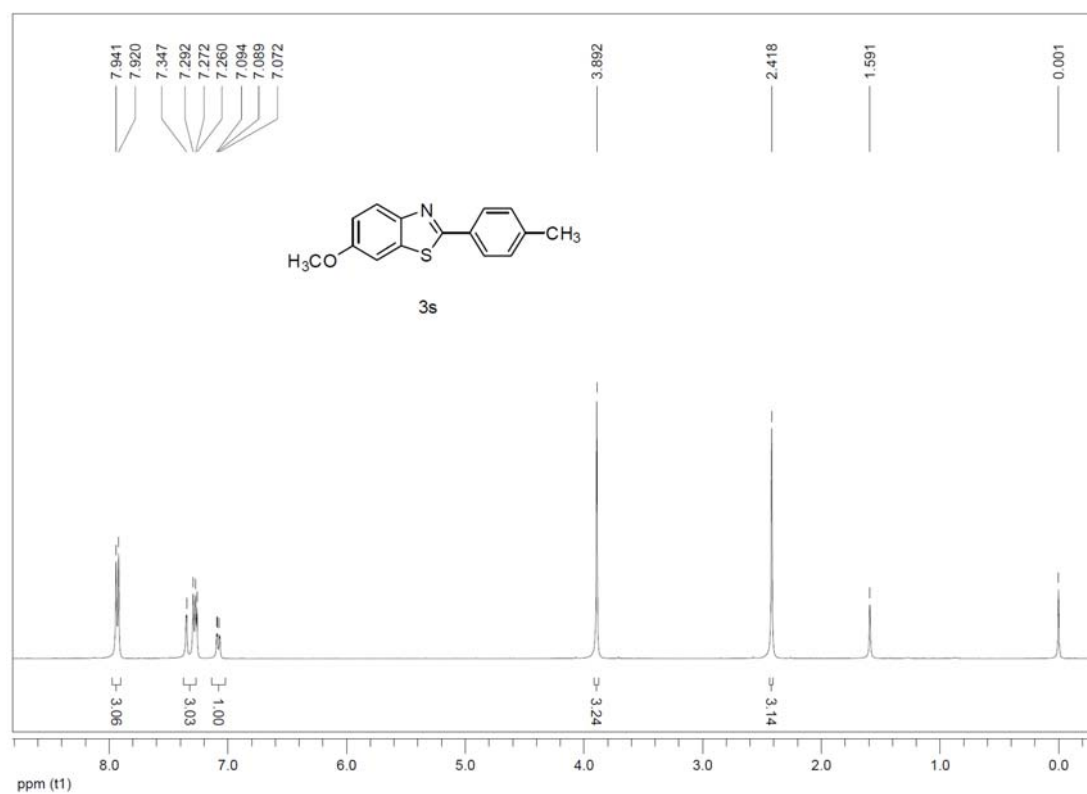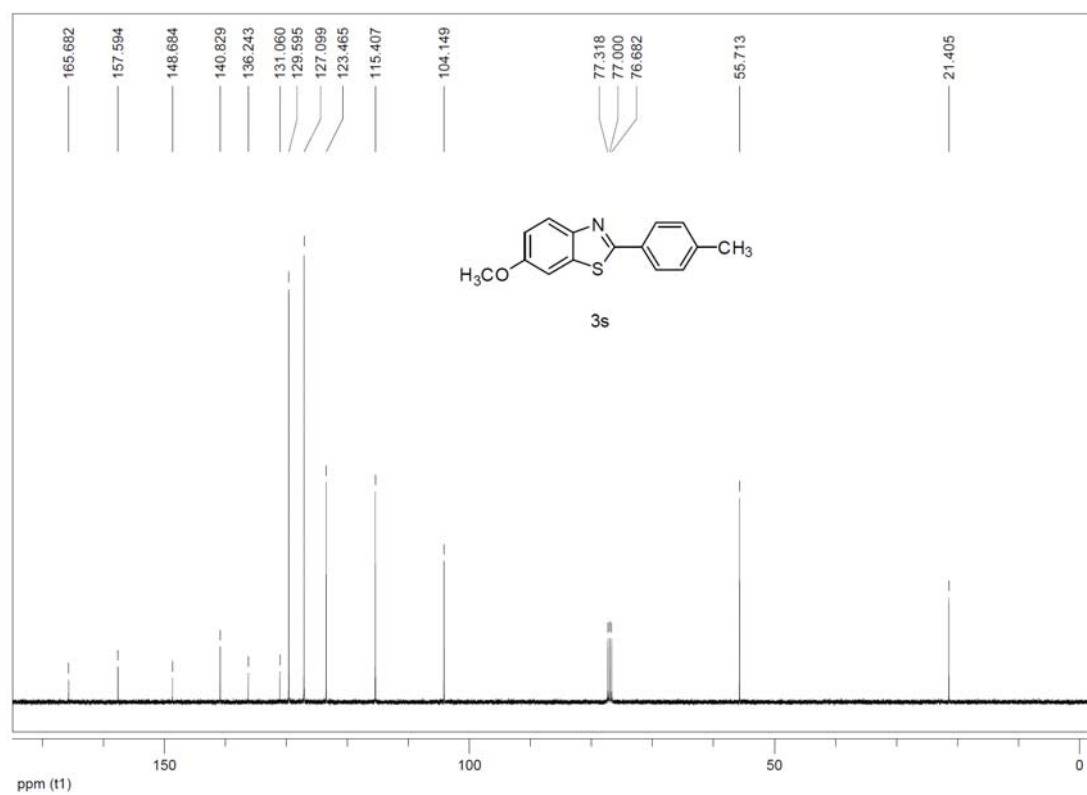

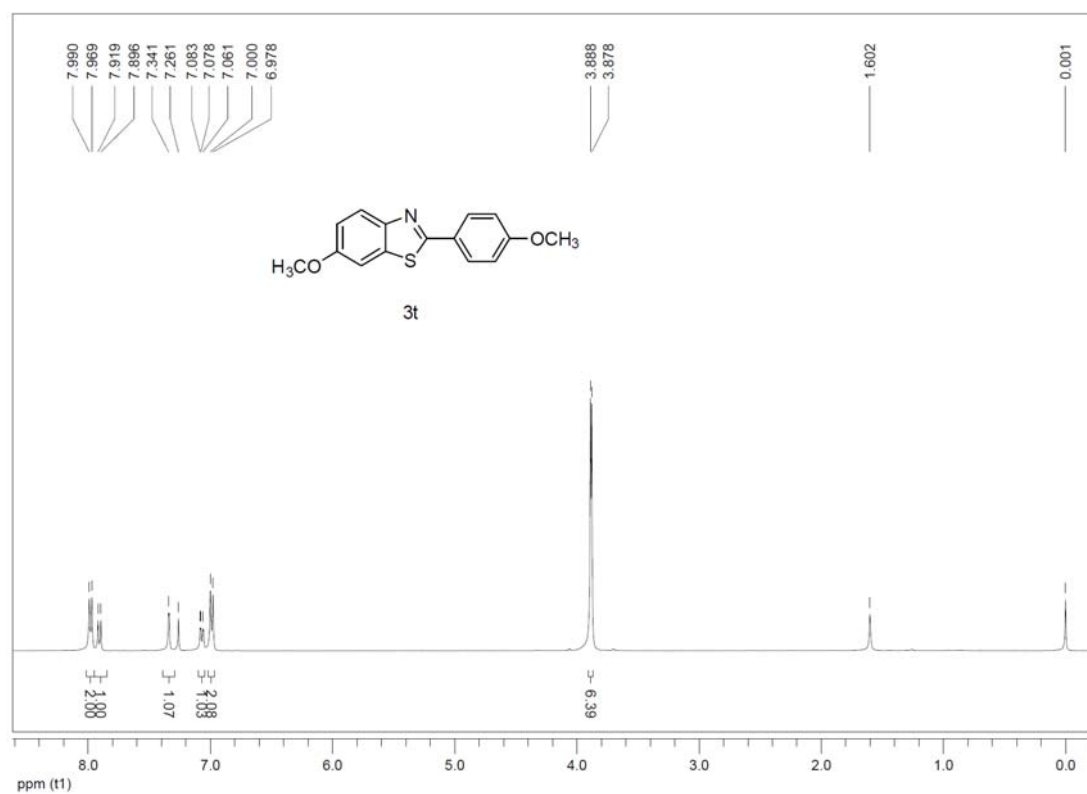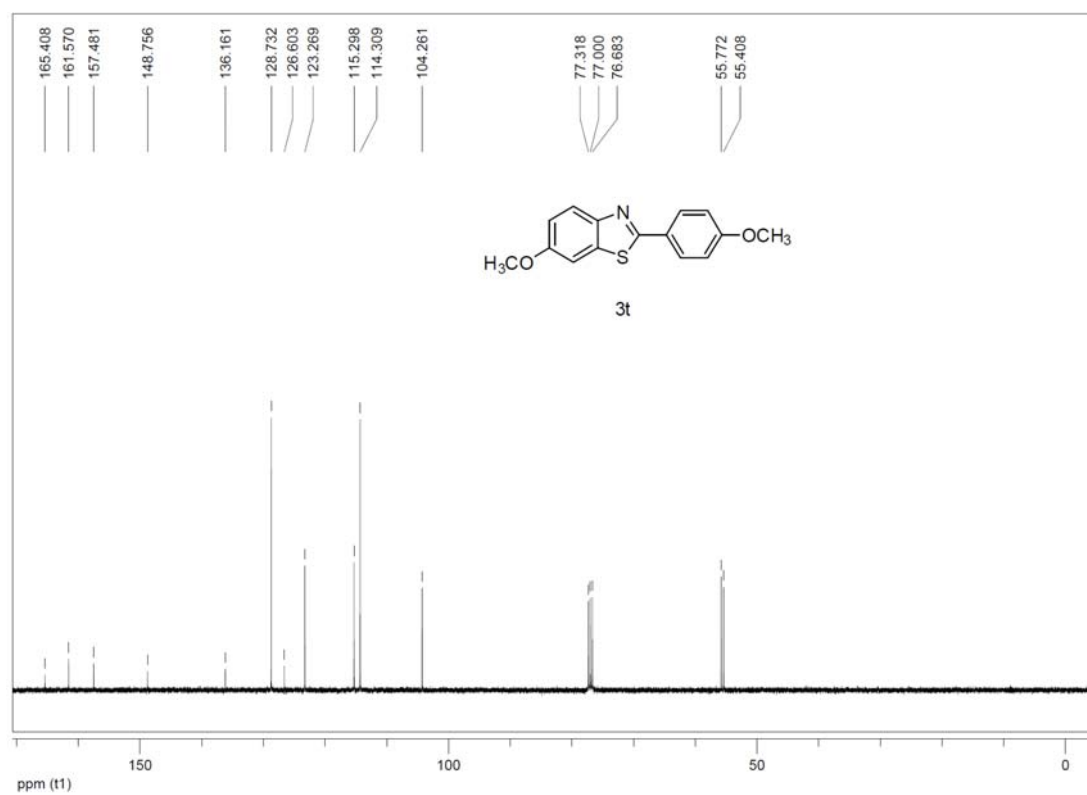

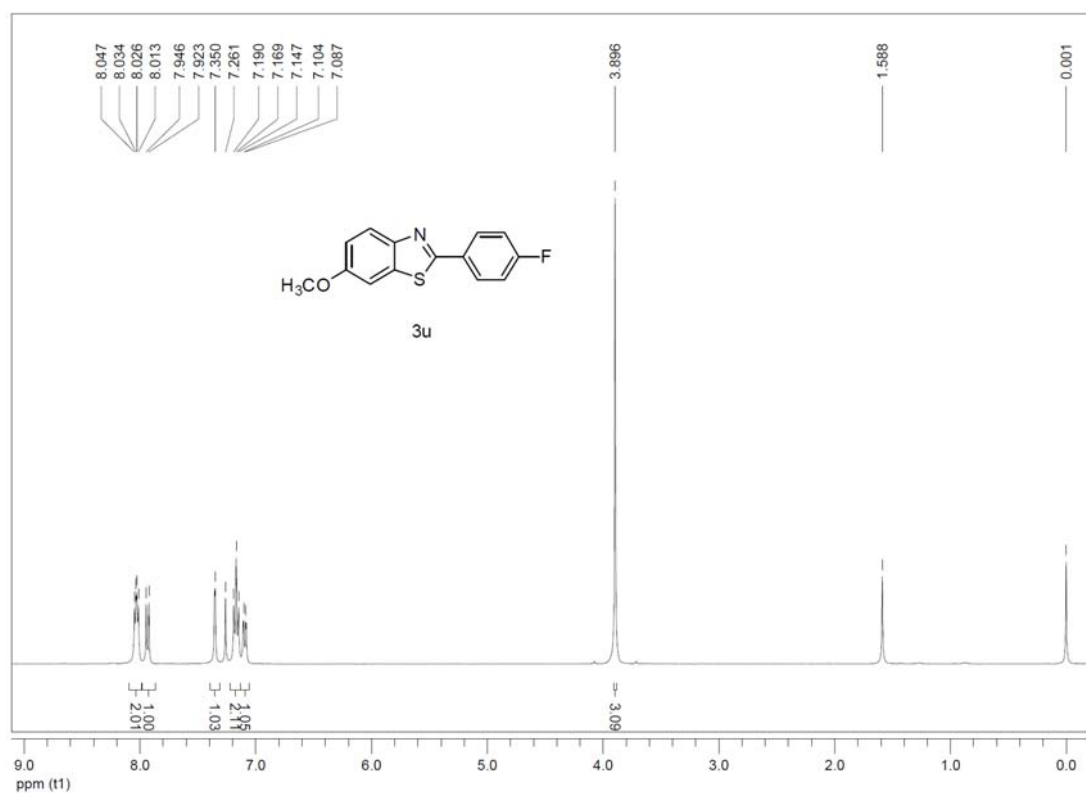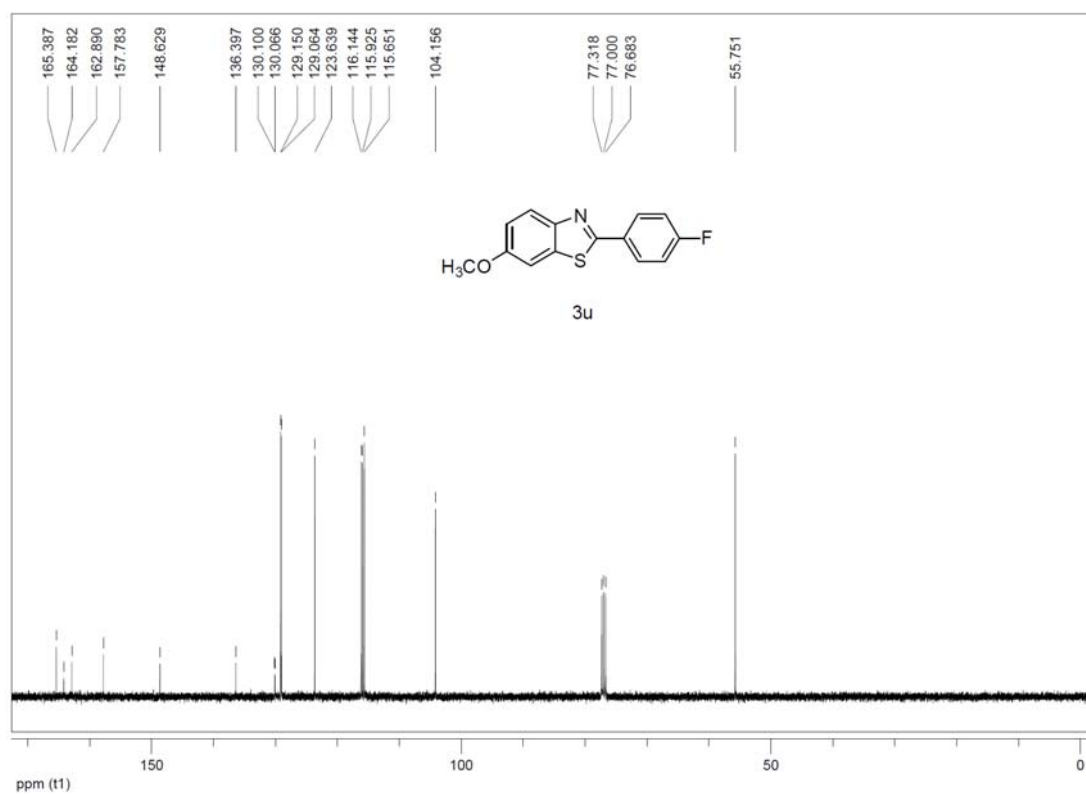

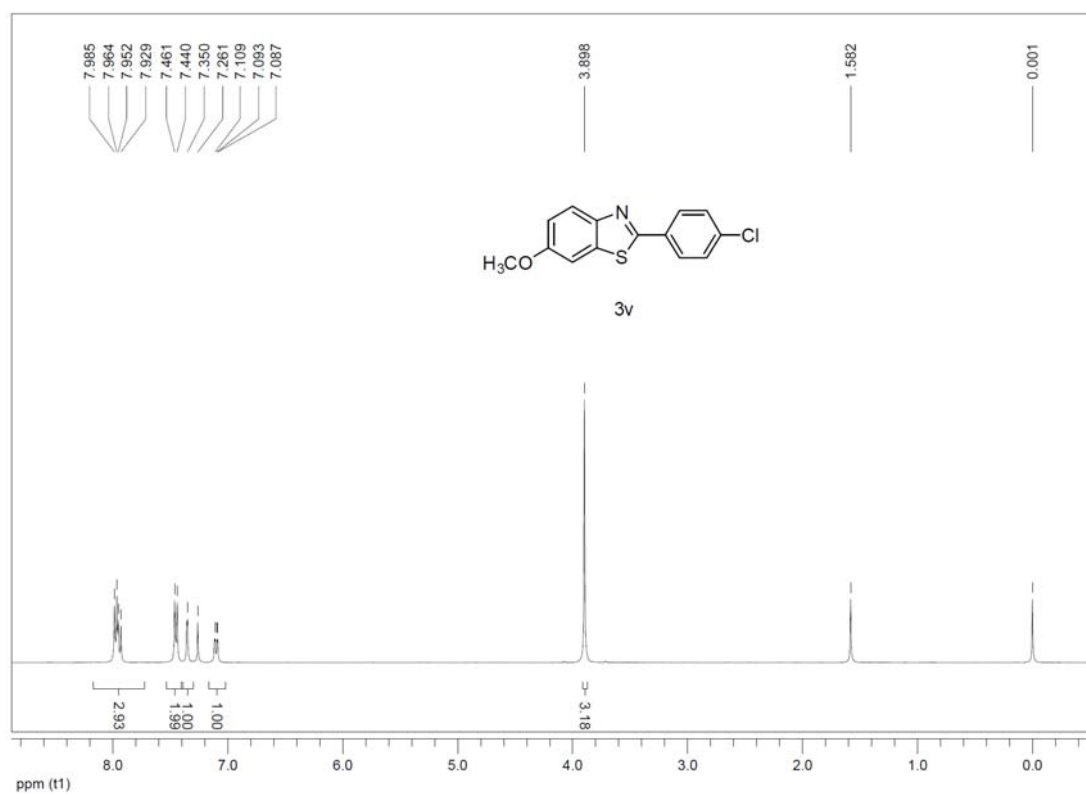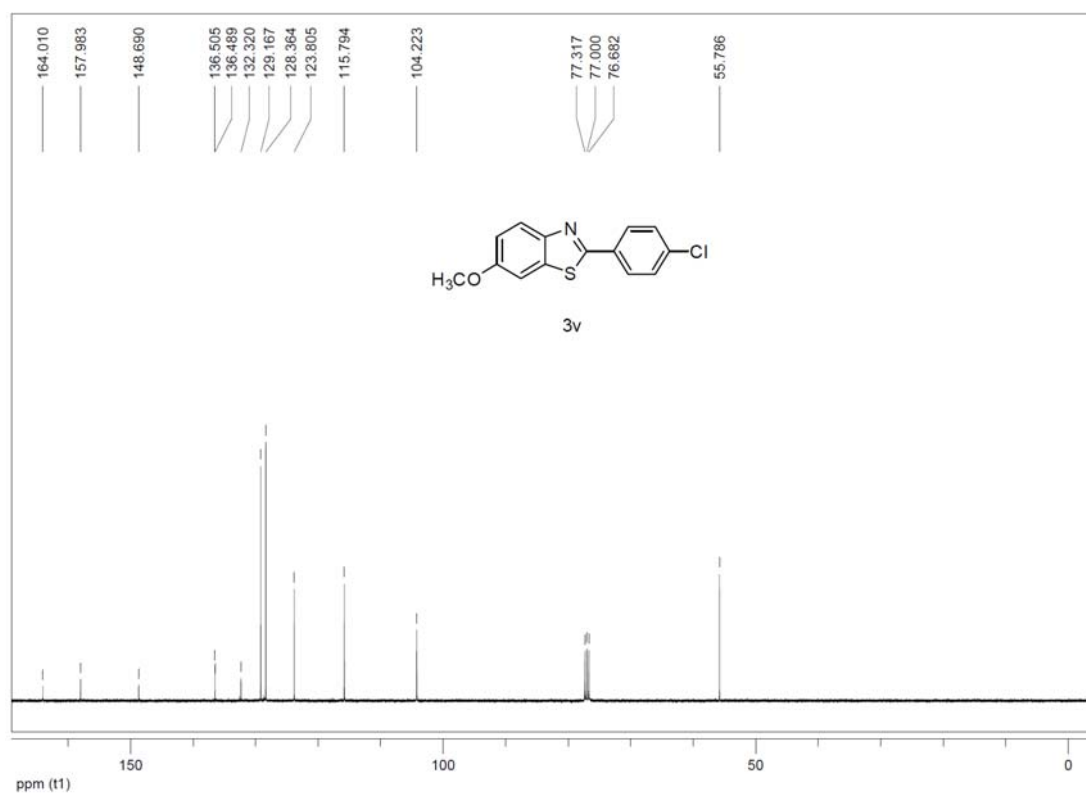



## GC-MS and $^{13}\text{C}$ NMR for $^{13}\text{C}$ labeling reaction

GC-MS:

已采集 : 7 Nov 2012 13:11 , 使用采集方法 FC01.M

仪器: GC-MSD

样品名:

其他信息 :

样品瓶号: 1

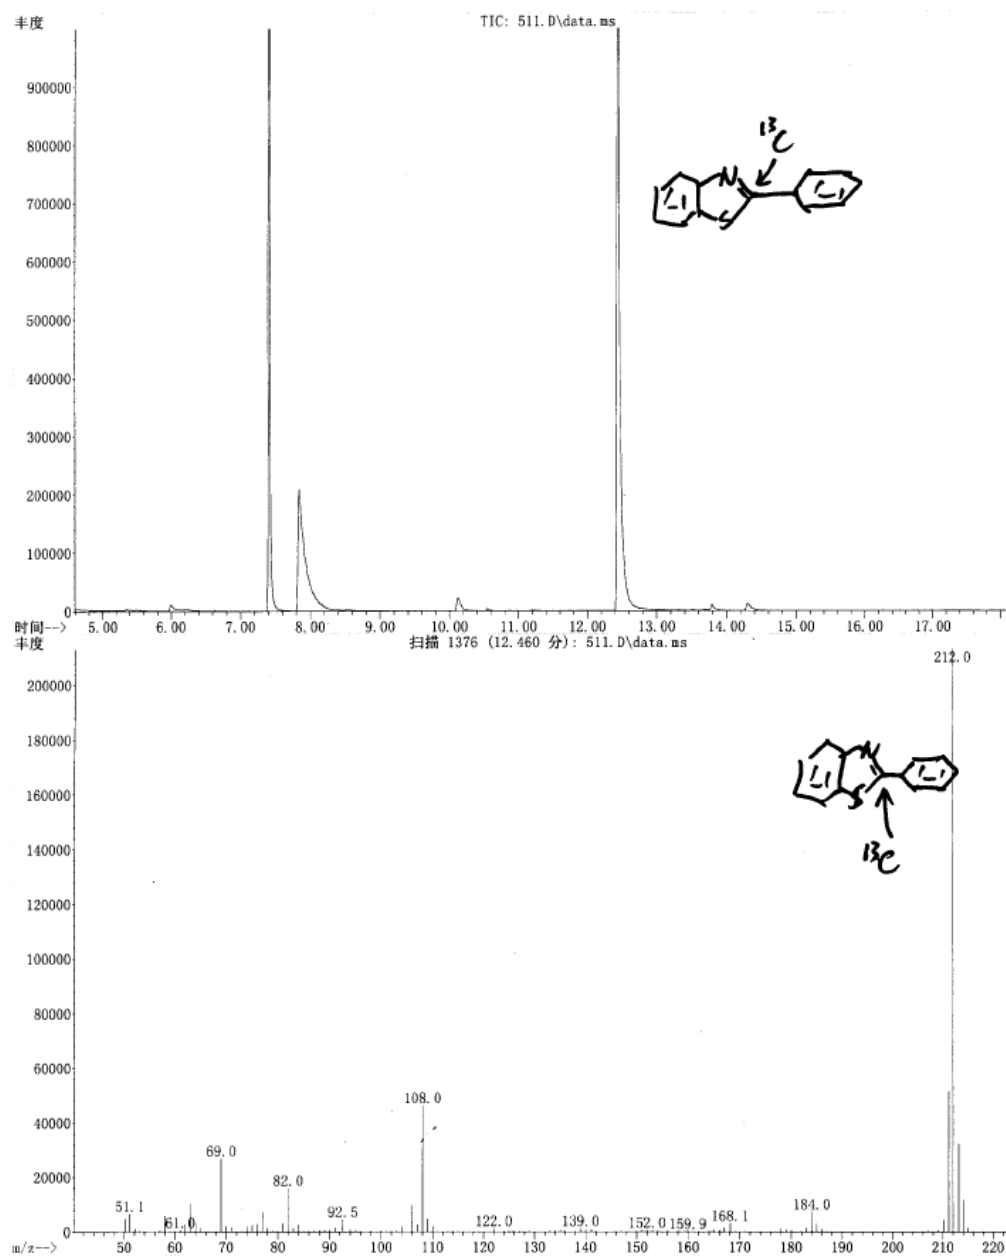

$^{13}\text{C}$  NMR:

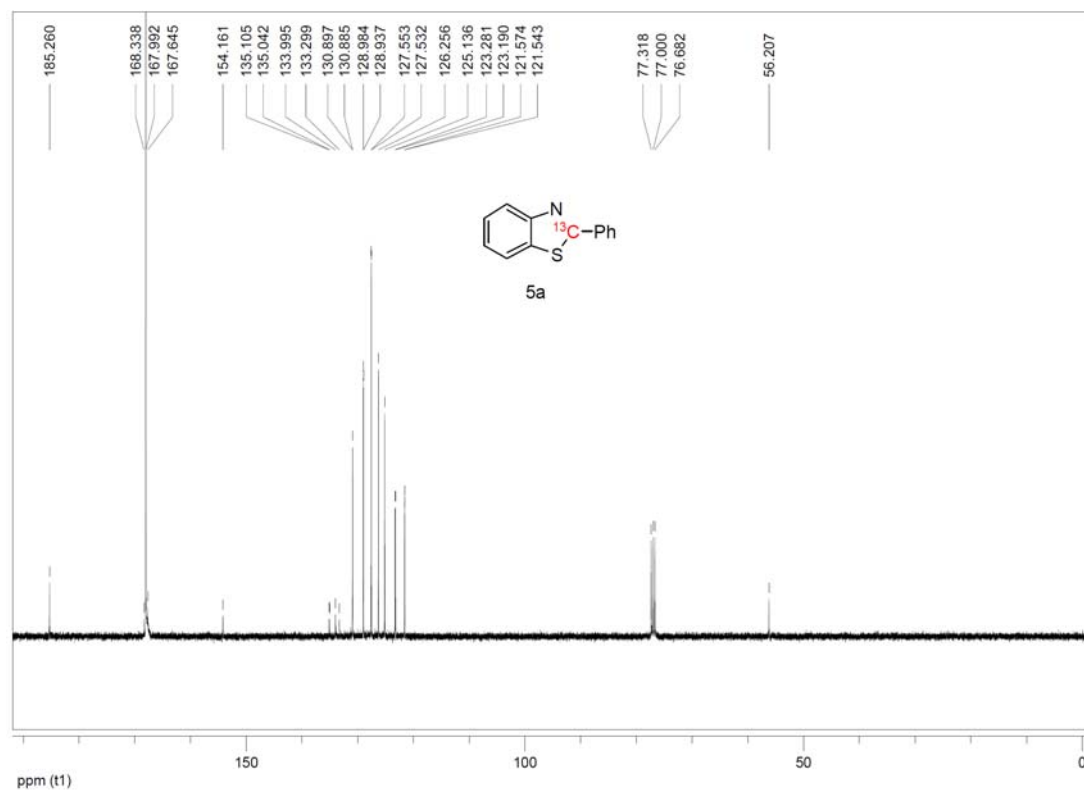

Supplement: Supplementary file 1 [file 4105291]
